# Supplementary material for: The hypoxia-associated genes in immune infiltration and treatment options of lung adenocarcinoma
Source: PeerJ journal article supplement (doi:10.7717/peerj.15621), 2023-08-07
Supplement: Figure_S4.pdf [file Figure_S4.pdf]

**A**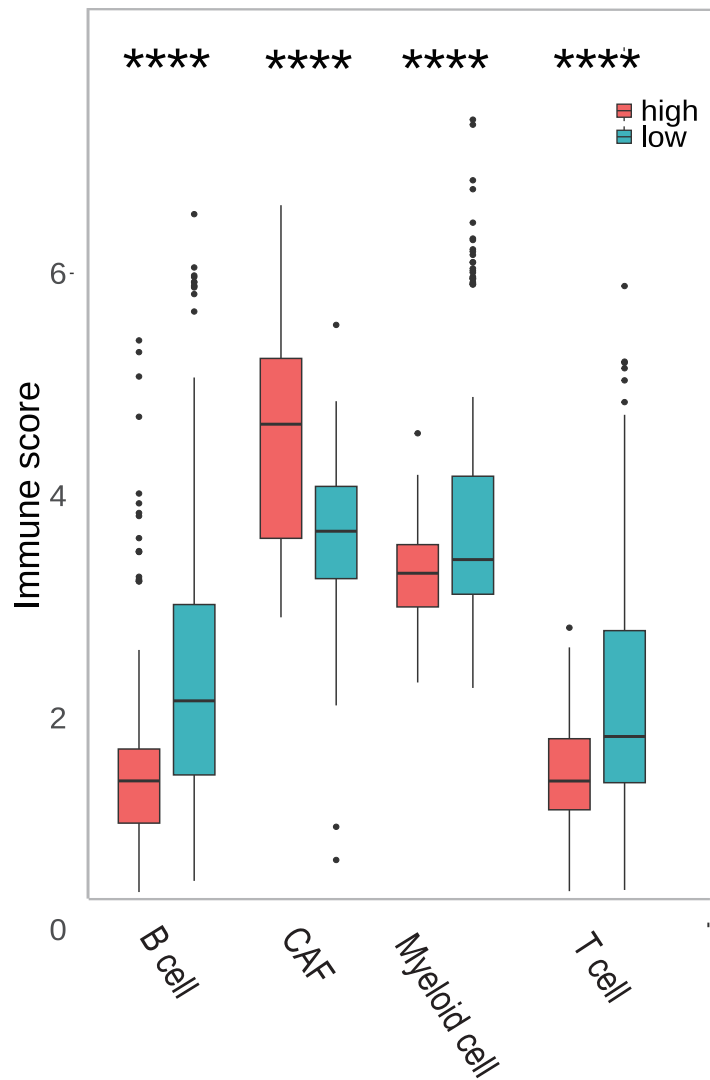**B**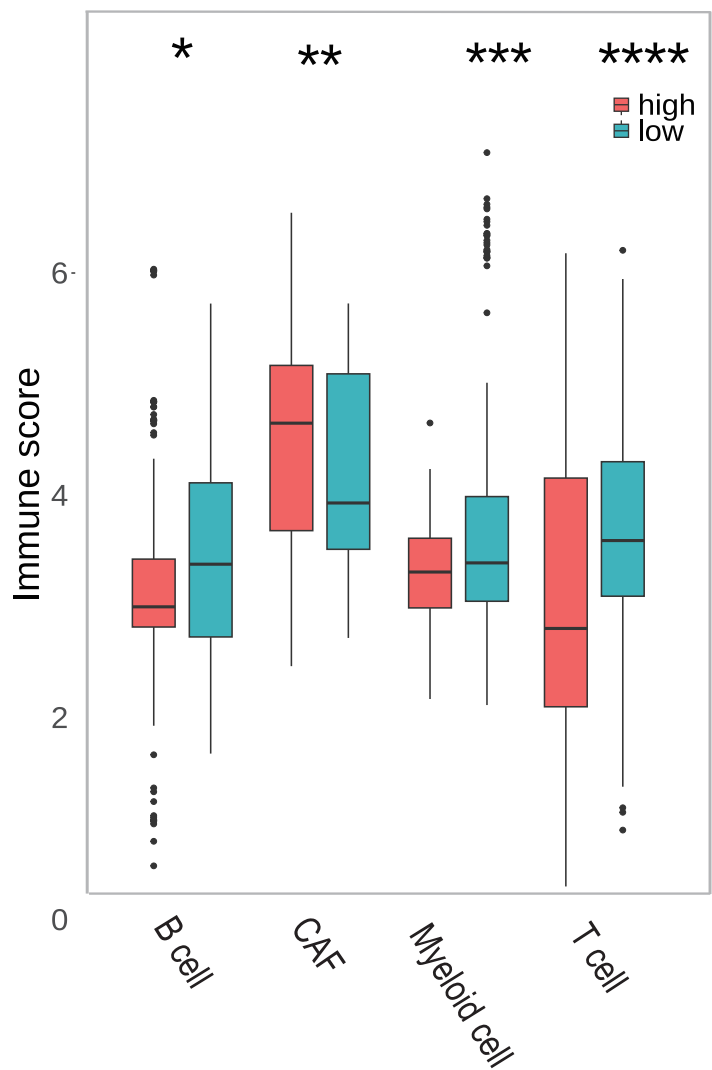**C**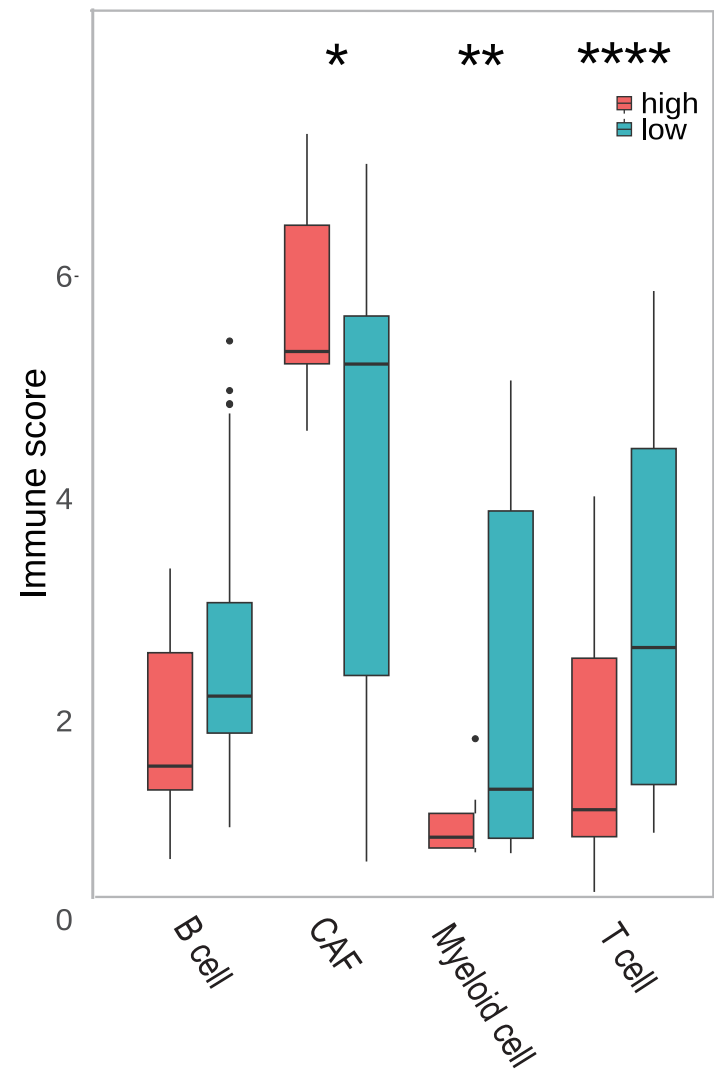

Tumor-infiltrating immune cells
