# Supplementary material for: The hypoxia-associated genes in immune infiltration and treatment options of lung adenocarcinoma
Source: PeerJ journal article supplement (doi:10.7717/peerj.15621), 2023-08-07
Supplement: Raw_data_codes.zip [file Raw_data_codes.zip]

## Sheet: mRNA
gene_id	gene_name	gene_type
ENSG00000284662	OR4F16	protein_coding
ENSG00000186827	TNFRSF4	protein_coding
ENSG00000186891	TNFRSF18	protein_coding
ENSG00000160072	ATAD3B	protein_coding
ENSG00000041988	THAP3	protein_coding
ENSG00000142611	PRDM16	protein_coding
ENSG00000067606	PRKCZ	protein_coding
ENSG00000131584	ACAP3	protein_coding
ENSG00000169972	PUSL1	protein_coding
ENSG00000157911	PEX10	protein_coding
ENSG00000224051	CPTP	protein_coding
ENSG00000157933	SKI	protein_coding
ENSG00000162591	MEGF6	protein_coding
ENSG00000169962	TAS1R3	protein_coding
ENSG00000116285	ERRFI1	protein_coding
ENSG00000142655	PEX14	protein_coding
ENSG00000149527	PLCH2	protein_coding
ENSG00000007923	DNAJC11	protein_coding
ENSG00000171621	SPSB1	protein_coding
ENSG00000162441	LZIC	protein_coding
ENSG00000187017	ESPN	protein_coding
ENSG00000173673	HES3	protein_coding
ENSG00000142583	SLC2A5	protein_coding
ENSG00000107404	DVL1	protein_coding
ENSG00000177000	MTHFR	protein_coding
ENSG00000069424	KCNAB2	protein_coding
ENSG00000074800	ENO1	protein_coding
ENSG00000116786	PLEKHM2	protein_coding
ENSG00000176022	B3GALT6	protein_coding
ENSG00000162496	DHRS3	protein_coding
ENSG00000131686	CA6	protein_coding
ENSG00000162494	LRRC38	protein_coding
ENSG00000173614	NMNAT1	protein_coding
ENSG00000279804	PRAMEF18	protein_coding
ENSG00000116273	PHF13	protein_coding
ENSG00000162592	CCDC27	protein_coding
ENSG00000116254	CHD5	protein_coding
ENSG00000049245	VAMP3	protein_coding
ENSG00000204624	DISP3	protein_coding
ENSG00000171603	CLSTN1	protein_coding
ENSG00000142606	MMEL1	protein_coding
ENSG00000177674	AGTRAP	protein_coding
ENSG00000162572	SCNN1D	protein_coding
ENSG00000171608	PIK3CD	protein_coding
ENSG00000171729	TMEM51	protein_coding
ENSG00000175262	C1orf127	protein_coding
ENSG00000162571	TTLL10	protein_coding
ENSG00000158109	TPRG1L	protein_coding
ENSG00000037637	FBXO42	protein_coding
ENSG00000184163	C1QTNF12	protein_coding
ENSG00000159423	ALDH4A1	protein_coding
ENSG00000142599	RERE	protein_coding
ENSG00000011021	CLCN6	protein_coding
ENSG00000215912	TTC34	protein_coding
ENSG00000120952	PRAMEF2	protein_coding
ENSG00000243073	PRAMEF4	protein_coding
ENSG00000142615	CELA2A	protein_coding
ENSG00000215704	CELA2B	protein_coding
ENSG00000065526	SPEN	protein_coding
ENSG00000175756	AURKAIP1	protein_coding
ENSG00000157916	RER1	protein_coding
ENSG00000157881	PANK4	protein_coding
ENSG00000116213	WRAP73	protein_coding
ENSG00000127463	EMC1	protein_coding
ENSG00000048707	VPS13D	protein_coding
ENSG00000158748	HTR6	protein_coding
ENSG00000130762	ARHGEF16	protein_coding
ENSG00000187144	SPATA21	protein_coding
ENSG00000162444	RBP7	protein_coding
ENSG00000279169	PRAMEF13	protein_coding
ENSG00000180758	GPR157	protein_coding
ENSG00000184677	ZBTB40	protein_coding
ENSG00000270136	MICOS10-NBL1	protein_coding
ENSG00000132879	FBXO44	protein_coding
ENSG00000187545	PRAMEF10	protein_coding
ENSG00000239810	PRAMEF11	protein_coding
ENSG00000116731	PRDM2	protein_coding
ENSG00000116721	PRAMEF1	protein_coding
ENSG00000131697	NPHP4	protein_coding
ENSG00000088280	ASAP3	protein_coding
ENSG00000188807	TMEM201	protein_coding
ENSG00000198793	MTOR	protein_coding
ENSG00000078900	TP73	protein_coding
ENSG00000142661	MYOM3	protein_coding
ENSG00000171819	ANGPTL7	protein_coding
ENSG00000197921	HES5	protein_coding
ENSG00000116288	PARK7	protein_coding
ENSG00000142677	IL22RA1	protein_coding
ENSG00000131910	NR0B2	protein_coding
ENSG00000185436	IFNLR1	protein_coding
ENSG00000131914	LIN28A	protein_coding
ENSG00000232423	PRAMEF6	protein_coding
ENSG00000169504	CLIC4	protein_coding
ENSG00000169641	LUZP1	protein_coding
ENSG00000181773	GPR3	protein_coding
ENSG00000175707	KDF1	protein_coding
ENSG00000233954	UQCRHL	protein_coding
ENSG00000174950	CD164L2	protein_coding
ENSG00000055070	SZRD1	protein_coding
ENSG00000175087	PDIK1L	protein_coding
ENSG00000171735	CAMTA1	protein_coding
ENSG00000157191	NECAP2	protein_coding
ENSG00000133226	SRRM1	protein_coding
ENSG00000162482	AKR7A3	protein_coding
ENSG00000236782	ZNF593OS	protein_coding
ENSG00000215910	C1orf167	protein_coding
ENSG00000116663	FBXO6	protein_coding
ENSG00000215695	RSC1A1	protein_coding
ENSG00000215906	LACTBL1	protein_coding
ENSG00000188822	CNR2	protein_coding
ENSG00000090273	NUDC	protein_coding
ENSG00000227868	TEX46	protein_coding
ENSG00000142751	GPN2	protein_coding
ENSG00000189266	PNRC2	protein_coding
ENSG00000162511	LAPTM5	protein_coding
ENSG00000158014	SLC30A2	protein_coding
ENSG00000204138	PHACTR4	protein_coding
ENSG00000142675	CNKSR1	protein_coding
ENSG00000197245	FAM110D	protein_coding
ENSG00000116237	ICMT	protein_coding
ENSG00000158195	WASF2	protein_coding
ENSG00000130772	MED18	protein_coding
ENSG00000204160	ZDHHC18	protein_coding
ENSG00000090020	SLC9A1	protein_coding
ENSG00000157978	LDLRAP1	protein_coding
ENSG00000158246	TENT5B	protein_coding
ENSG00000130770	ATP5IF1	protein_coding
ENSG00000117305	HMGCL	protein_coding
ENSG00000162512	SDC3	protein_coding
ENSG00000198746	GPATCH3	protein_coding
ENSG00000158006	PAFAH2	protein_coding
ENSG00000188529	SRSF10	protein_coding
ENSG00000142784	WDTC1	protein_coding
ENSG00000117682	DHDDS	protein_coding
ENSG00000175793	SFN	protein_coding
ENSG00000126698	DNAJC8	protein_coding
ENSG00000130766	SESN2	protein_coding
ENSG00000168528	SERINC2	protein_coding
ENSG00000196581	AJAP1	protein_coding
ENSG00000169403	PTAFR	protein_coding
ENSG00000117676	RPS6KA1	protein_coding
ENSG00000198830	HMGN2	protein_coding
ENSG00000084628	NKAIN1	protein_coding
ENSG00000060688	SNRNP40	protein_coding
ENSG00000171612	SLC25A33	protein_coding
ENSG00000162458	FBLIM1	protein_coding
ENSG00000188910	GJB3	protein_coding
ENSG00000116138	DNAJC16	protein_coding
ENSG00000142765	SYTL1	protein_coding
ENSG00000158161	EYA3	protein_coding
ENSG00000142684	ZNF593	protein_coding
ENSG00000060642	PIGV	protein_coding
ENSG00000121769	FABP3	protein_coding
ENSG00000157330	C1orf158	protein_coding
ENSG00000162413	KLHL21	protein_coding
ENSG00000142627	EPHA2	protein_coding
ENSG00000142632	ARHGEF19	protein_coding
ENSG00000162490	DRAXIN	protein_coding
ENSG00000158292	GPR153	protein_coding
ENSG00000142733	MAP3K6	protein_coding
ENSG00000189337	KAZN	protein_coding
ENSG00000270601	PRAMEF5	protein_coding
ENSG00000028137	TNFRSF1B	protein_coding
ENSG00000162460	TMEM82	protein_coding
ENSG00000142687	KIAA0319L	protein_coding
ENSG00000130939	UBE4B	protein_coding
ENSG00000127472	PLA2G5	protein_coding
ENSG00000060656	PTPRU	protein_coding
ENSG00000163867	ZMYM6	protein_coding
ENSG00000189280	GJB5	protein_coding
ENSG00000134698	AGO4	protein_coding
ENSG00000134690	CDCA8	protein_coding
ENSG00000132881	CPLANE2	protein_coding
ENSG00000273274	ZBTB8B	protein_coding
ENSG00000116251	RPL22	protein_coding
ENSG00000158286	RNF207	protein_coding
ENSG00000009709	PAX7	protein_coding
ENSG00000043514	TRIT1	protein_coding
ENSG00000162510	MATN1	protein_coding
ENSG00000179002	TAS1R2	protein_coding
ENSG00000188984	AADACL3	protein_coding
ENSG00000158008	EXTL1	protein_coding
ENSG00000130940	CASZ1	protein_coding
ENSG00000116771	AGMAT	protein_coding
ENSG00000162585	FAAP20	protein_coding
ENSG00000163879	DNALI1	protein_coding
ENSG00000127129	EDN2	protein_coding
ENSG00000010803	SCMH1	protein_coding
ENSG00000169991	IFFO2	protein_coding
ENSG00000116954	RRAGC	protein_coding
ENSG00000117013	KCNQ4	protein_coding
ENSG00000163873	GRIK3	protein_coding
ENSG00000117215	PLA2G2D	protein_coding
ENSG00000196449	YRDC	protein_coding
ENSG00000237700	PRAMEF33	protein_coding
ENSG00000253368	TRNP1	protein_coding
ENSG00000179862	CITED4	protein_coding
ENSG00000116661	FBXO2	protein_coding
ENSG00000162461	SLC25A34	protein_coding
ENSG00000044012	GUCA2B	protein_coding
ENSG00000179051	RCC2	protein_coding
ENSG00000053372	MRTO4	protein_coding
ENSG00000126067	PSMB2	protein_coding
ENSG00000066136	NFYC	protein_coding
ENSG00000132906	CASP9	protein_coding
ENSG00000197312	DDI2	protein_coding
ENSG00000173660	UQCRH	protein_coding
ENSG00000092847	AGO1	protein_coding
ENSG00000204510	PRAMEF7	protein_coding
ENSG00000054118	THRAP3	protein_coding
ENSG00000177181	RIMKLA	protein_coding
ENSG00000276747	PADI6	protein_coding
ENSG00000159339	PADI4	protein_coding
ENSG00000162373	BEND5	protein_coding
ENSG00000197982	C1orf122	protein_coding
ENSG00000183317	EPHA10	protein_coding
ENSG00000183386	FHL3	protein_coding
ENSG00000158315	RHBDL2	protein_coding
ENSG00000243749	TMEM35B	protein_coding
ENSG00000204084	INPP5B	protein_coding
ENSG00000186973	FAM183A	protein_coding
ENSG00000142698	C1orf94	protein_coding
ENSG00000146463	ZMYM4	protein_coding
ENSG00000183520	UTP11	protein_coding
ENSG00000090686	USP48	protein_coding
ENSG00000085998	POMGNT1	protein_coding
ENSG00000142686	C1orf216	protein_coding
ENSG00000117148	ACTL8	protein_coding
ENSG00000127125	PPCS	protein_coding
ENSG00000197429	IPP	protein_coding
ENSG00000117000	RLF	protein_coding
ENSG00000178585	CTNNBIP1	protein_coding
ENSG00000092853	CLSPN	protein_coding
ENSG00000198754	OXCT2	protein_coding
ENSG00000134697	GNL2	protein_coding
ENSG00000187513	GJA4	protein_coding
ENSG00000278139	P3R3URF-PIK3R3	protein_coding
ENSG00000116151	MORN1	protein_coding
ENSG00000006555	TTC22	protein_coding
ENSG00000066056	TIE1	protein_coding
ENSG00000214114	MYCBP	protein_coding
ENSG00000173436	MICOS10	protein_coding
ENSG00000116544	DLGAP3	protein_coding
ENSG00000204060	FOXO6	protein_coding
ENSG00000186094	AGBL4	protein_coding
ENSG00000117016	RIMS3	protein_coding
ENSG00000121310	ECHDC2	protein_coding
ENSG00000169213	RAB3B	protein_coding
ENSG00000163866	SMIM12	protein_coding
ENSG00000049249	TNFRSF9	protein_coding
ENSG00000171793	CTPS1	protein_coding
ENSG00000116990	MYCL	protein_coding
ENSG00000143001	TMEM61	protein_coding
ENSG00000274386	TMEM269	protein_coding
ENSG00000117419	ERI3	protein_coding
ENSG00000162384	CZIB	protein_coding
ENSG00000162391	FAM151A	protein_coding
ENSG00000174348	PODN	protein_coding
ENSG00000117859	OSBPL9	protein_coding
ENSG00000253313	C1orf210	protein_coding
ENSG00000040487	SLC66A1	protein_coding
ENSG00000162396	PARS2	protein_coding
ENSG00000203995	ZYG11A	protein_coding
ENSG00000117713	ARID1A	protein_coding
ENSG00000177868	SVBP	protein_coding
ENSG00000162378	ZYG11B	protein_coding
ENSG00000162599	NFIA	protein_coding
ENSG00000240563	L1TD1	protein_coding
ENSG00000117862	TXNDC12	protein_coding
ENSG00000162551	ALPL	protein_coding
ENSG00000183431	SF3A3	protein_coding
ENSG00000169174	PCSK9	protein_coding
ENSG00000243725	TTC4	protein_coding
ENSG00000116985	BMP8B	protein_coding
ENSG00000134716	CYP2J2	protein_coding
ENSG00000171872	KLF17	protein_coding
ENSG00000162407	PLPP3	protein_coding
ENSG00000169218	RSPO1	protein_coding
ENSG00000163877	SNIP1	protein_coding
ENSG00000157184	CPT2	protein_coding
ENSG00000198815	FOXJ3	protein_coding
ENSG00000134744	TUT4	protein_coding
ENSG00000162437	RAVER2	protein_coding
ENSG00000283039	KLF18	protein_coding
ENSG00000184292	TACSTD2	protein_coding
ENSG00000187140	FOXD3	protein_coding
ENSG00000186409	CCDC30	protein_coding
ENSG00000162595	DIRAS3	protein_coding
ENSG00000171357	LURAP1	protein_coding
ENSG00000162385	MAGOH	protein_coding
ENSG00000086015	MAST2	protein_coding
ENSG00000184588	PDE4B	protein_coding
ENSG00000117472	TSPAN1	protein_coding
ENSG00000123080	CDKN2C	protein_coding
ENSG00000077549	CAPZB	protein_coding
ENSG00000162598	C1orf87	protein_coding
ENSG00000162415	ZSWIM5	protein_coding
ENSG00000185483	ROR1	protein_coding
ENSG00000162600	OMA1	protein_coding
ENSG00000116704	SLC35D1	protein_coding
ENSG00000157193	LRP8	protein_coding
ENSG00000116205	TCEANC2	protein_coding
ENSG00000198841	KTI12	protein_coding
ENSG00000116212	LRRC42	protein_coding
ENSG00000116729	WLS	protein_coding
ENSG00000132854	KANK4	protein_coding
ENSG00000162616	DNAJB4	protein_coding
ENSG00000162607	USP1	protein_coding
ENSG00000154027	AK5	protein_coding
ENSG00000132122	SPATA6	protein_coding
ENSG00000137960	GIPC2	protein_coding
ENSG00000116745	RPE65	protein_coding
ENSG00000132855	ANGPTL3	protein_coding
ENSG00000172380	GNG12	protein_coding
ENSG00000116675	DNAJC6	protein_coding
ENSG00000162433	AK4	protein_coding
ENSG00000213625	LEPROT	protein_coding
ENSG00000085999	RAD54L	protein_coding
ENSG00000158966	CACHD1	protein_coding
ENSG00000203965	EFCAB7	protein_coding
ENSG00000153898	MCOLN2	protein_coding
ENSG00000117069	ST6GALNAC5	protein_coding
ENSG00000187048	CYP4A11	protein_coding
ENSG00000125703	ATG4C	protein_coding
ENSG00000154007	ASB17	protein_coding
ENSG00000162618	ADGRL4	protein_coding
ENSG00000131233	GJA9	protein_coding
ENSG00000153936	HS2ST1	protein_coding
ENSG00000174021	GNG5	protein_coding
ENSG00000084072	PPIE	protein_coding
ENSG00000180488	MIGA1	protein_coding
ENSG00000016490	CLCA1	protein_coding
ENSG00000188786	MTF1	protein_coding
ENSG00000117151	CTBS	protein_coding
ENSG00000162434	JAK1	protein_coding
ENSG00000137941	TTLL7	protein_coding
ENSG00000116717	GADD45A	protein_coding
ENSG00000137968	SLC44A5	protein_coding
ENSG00000066135	KDM4A	protein_coding
ENSG00000117174	ZNHIT6	protein_coding
ENSG00000184313	MROH7	protein_coding
ENSG00000122420	PTGFR	protein_coding
ENSG00000143013	LMO4	protein_coding
ENSG00000134748	PRPF38A	protein_coding
ENSG00000097096	SYDE2	protein_coding
ENSG00000142892	PIGK	protein_coding
ENSG00000184005	ST6GALNAC3	protein_coding
ENSG00000197273	GUCA2A	protein_coding
ENSG00000058804	NDC1	protein_coding
ENSG00000162402	USP24	protein_coding
ENSG00000116641	DOCK7	protein_coding
ENSG00000172260	NEGR1	protein_coding
ENSG00000185104	FAF1	protein_coding
ENSG00000117480	FAAH	protein_coding
ENSG00000137944	KYAT3	protein_coding
ENSG00000182183	SHISAL2A	protein_coding
ENSG00000067334	DNTTIP2	protein_coding
ENSG00000122417	ODF2L	protein_coding
ENSG00000142949	PTPRF	protein_coding
ENSG00000116133	DHCR24	protein_coding
ENSG00000171502	COL24A1	protein_coding
ENSG00000162399	BSND	protein_coding
ENSG00000116157	GPX7	protein_coding
ENSG00000143036	SLC44A3	protein_coding
ENSG00000065243	PKN2	protein_coding
ENSG00000117500	TMED5	protein_coding
ENSG00000016602	CLCA4	protein_coding
ENSG00000171790	SLFNL1	protein_coding
ENSG00000117528	ABCD3	protein_coding
ENSG00000271723	MROH7-TTC4	protein_coding
ENSG00000066185	ZMYND12	protein_coding
ENSG00000172339	ALG14	protein_coding
ENSG00000036549	ZZZ3	protein_coding
ENSG00000058799	YIPF1	protein_coding
ENSG00000203985	LDLRAD1	protein_coding
ENSG00000189433	GJB4	protein_coding
ENSG00000179178	TMEM125	protein_coding
ENSG00000142700	DMRTA2	protein_coding
ENSG00000127124	HIVEP3	protein_coding
ENSG00000097033	SH3GLB1	protein_coding
ENSG00000182330	PRAMEF8	protein_coding
ENSG00000162604	TM2D1	protein_coding
ENSG00000116171	SCP2	protein_coding
ENSG00000134709	HOOK1	protein_coding
ENSG00000137936	BCAR3	protein_coding
ENSG00000143032	BARHL2	protein_coding
ENSG00000178028	DMAP1	protein_coding
ENSG00000168710	AHCYL1	protein_coding
ENSG00000117519	CNN3	protein_coding
ENSG00000134215	VAV3	protein_coding
ENSG00000188641	DPYD	protein_coding
ENSG00000152078	TLCD4	protein_coding
ENSG00000185668	POU3F1	protein_coding
ENSG00000171492	LRRC8D	protein_coding
ENSG00000170989	S1PR1	protein_coding
ENSG00000186086	NBPF6	protein_coding
ENSG00000055732	MCOLN3	protein_coding
ENSG00000116299	ELAPOR1	protein_coding
ENSG00000137962	ARHGAP29	protein_coding
ENSG00000198691	ABCA4	protein_coding
ENSG00000079739	PGM1	protein_coding
ENSG00000117154	IGSF21	protein_coding
ENSG00000162377	COA7	protein_coding
ENSG00000116670	MAD2L2	protein_coding
ENSG00000116774	OLFML3	protein_coding
ENSG00000269113	TRABD2B	protein_coding
ENSG00000023909	GCLM	protein_coding
ENSG00000117133	RPF1	protein_coding
ENSG00000069702	TGFBR3	protein_coding
ENSG00000117461	PIK3R3	protein_coding
ENSG00000198198	SZT2	protein_coding
ENSG00000116793	PHTF1	protein_coding
ENSG00000134201	GSTM5	protein_coding
ENSG00000116455	WDR77	protein_coding
ENSG00000213366	GSTM2	protein_coding
ENSG00000117525	F3	protein_coding
ENSG00000099260	PALMD	protein_coding
ENSG00000282608	ADORA3	protein_coding
ENSG00000134258	VTCN1	protein_coding
ENSG00000162692	VCAM1	protein_coding
ENSG00000163349	HIPK1	protein_coding
ENSG00000134222	PSRC1	protein_coding
ENSG00000181656	GPR88	protein_coding
ENSG00000122481	RWDD3	protein_coding
ENSG00000198162	MAN1A2	protein_coding
ENSG00000196369	SRGAP2B	protein_coding
ENSG00000171517	LPAR3	protein_coding
ENSG00000117543	DPH5	protein_coding
ENSG00000143079	CTTNBP2NL	protein_coding
ENSG00000134243	SORT1	protein_coding
ENSG00000134250	NOTCH2	protein_coding
ENSG00000162643	DNAI3	protein_coding
ENSG00000143093	STRIP1	protein_coding
ENSG00000188761	BCL2L15	protein_coding
ENSG00000085491	SLC25A24	protein_coding
ENSG00000117598	PLPPR5	protein_coding
ENSG00000221986	MYBPHL	protein_coding
ENSG00000173947	PIFO	protein_coding
ENSG00000134198	TSPAN2	protein_coding
ENSG00000215784	FAM72D	protein_coding
ENSG00000155363	MOV10	protein_coding
ENSG00000198799	LRIG2	protein_coding
ENSG00000143106	PSMA5	protein_coding
ENSG00000117620	SLC35A3	protein_coding
ENSG00000162688	AGL	protein_coding
ENSG00000197106	SLC6A17	protein_coding
ENSG00000271601	LIX1L	protein_coding
ENSG00000203859	HSD3B2	protein_coding
ENSG00000134242	PTPN22	protein_coding
ENSG00000060718	COL11A1	protein_coding
ENSG00000185946	RNPC3	protein_coding
ENSG00000162627	SNX7	protein_coding
ENSG00000134262	AP4B1	protein_coding
ENSG00000186141	POLR3C	protein_coding
ENSG00000031698	SARS1	protein_coding
ENSG00000162695	SLC30A7	protein_coding
ENSG00000134184	GSTM1	protein_coding
ENSG00000265808	SEC22B	protein_coding
ENSG00000162601	MYSM1	protein_coding
ENSG00000272031	ANKRD34A	protein_coding
ENSG00000174332	GLIS1	protein_coding
ENSG00000134247	PTGFRN	protein_coding
ENSG00000116752	BCAS2	protein_coding
ENSG00000162664	ZNF326	protein_coding
ENSG00000134253	TRIM45	protein_coding
ENSG00000173218	VANGL1	protein_coding
ENSG00000168509	HJV	protein_coding
ENSG00000121933	TMIGD3	protein_coding
ENSG00000183508	TENT5C	protein_coding
ENSG00000174827	PDZK1	protein_coding
ENSG00000136631	VPS45	protein_coding
ENSG00000286019	NOTCH2NLB	protein_coding
ENSG00000265491	RNF115	protein_coding
ENSG00000198765	SYCP1	protein_coding
ENSG00000143398	PIP5K1A	protein_coding
ENSG00000196505	GDAP2	protein_coding
ENSG00000117360	PRPF3	protein_coding
ENSG00000154451	GBP5	protein_coding
ENSG00000118655	DCLRE1B	protein_coding
ENSG00000269713	NBPF9	protein_coding
ENSG00000256374	PPIAL4D	protein_coding
ENSG00000268043	NBPF12	protein_coding
ENSG00000116489	CAPZA1	protein_coding
ENSG00000155367	PPM1J	protein_coding
ENSG00000134200	TSHB	protein_coding
ENSG00000143442	POGZ	protein_coding
ENSG00000118292	C1orf54	protein_coding
ENSG00000065183	WDR3	protein_coding
ENSG00000235942	LCE6A	protein_coding
ENSG00000023902	PLEKHO1	protein_coding
ENSG00000163393	SLC22A15	protein_coding
ENSG00000131778	CHD1L	protein_coding
ENSG00000163156	SCNM1	protein_coding
ENSG00000143631	FLG	protein_coding
ENSG00000159377	PSMB4	protein_coding
ENSG00000270339	PPIAL4H	protein_coding
ENSG00000156150	ALX3	protein_coding
ENSG00000169469	SPRR1B	protein_coding
ENSG00000177551	NHLH2	protein_coding
ENSG00000197323	TRIM33	protein_coding
ENSG00000244094	SPRR2F	protein_coding
ENSG00000178104	PDE4DIP	protein_coding
ENSG00000079335	CDC14A	protein_coding
ENSG00000143119	CD53	protein_coding
ENSG00000117362	APH1A	protein_coding
ENSG00000160685	ZBTB7B	protein_coding
ENSG00000143520	FLG2	protein_coding
ENSG00000171943	SRGAP2C	protein_coding
ENSG00000196734	LCE1B	protein_coding
ENSG00000155761	SPAG17	protein_coding
ENSG00000159208	CIART	protein_coding
ENSG00000143373	ZNF687	protein_coding
ENSG00000116830	TTF2	protein_coding
ENSG00000143556	S100A7	protein_coding
ENSG00000286219	NOTCH2NLC	protein_coding
ENSG00000163218	PGLYRP4	protein_coding
ENSG00000173207	CKS1B	protein_coding
ENSG00000143614	GATAD2B	protein_coding
ENSG00000169418	NPR1	protein_coding
ENSG00000081026	MAGI3	protein_coding
ENSG00000116473	RAP1A	protein_coding
ENSG00000085465	OVGP1	protein_coding
ENSG00000197364	S100A7L2	protein_coding
ENSG00000186150	UBL4B	protein_coding
ENSG00000143554	SLC27A3	protein_coding
ENSG00000143458	GABPB2	protein_coding
ENSG00000118298	CA14	protein_coding
ENSG00000143595	AQP10	protein_coding
ENSG00000073754	CD5L	protein_coding
ENSG00000143546	S100A8	protein_coding
ENSG00000143416	SELENBP1	protein_coding
ENSG00000131781	FMO5	protein_coding
ENSG00000286106	NOTCH2NLR	protein_coding
ENSG00000121851	POLR3GL	protein_coding
ENSG00000134202	GSTM3	protein_coding
ENSG00000163220	S100A9	protein_coding
ENSG00000163155	LYSMD1	protein_coding
ENSG00000163216	SPRR2D	protein_coding
ENSG00000143603	KCNN3	protein_coding
ENSG00000160688	FLAD1	protein_coding
ENSG00000116459	ATP5PB	protein_coding
ENSG00000163344	PMVK	protein_coding
ENSG00000162738	VANGL2	protein_coding
ENSG00000143552	NUP210L	protein_coding
ENSG00000186364	NUDT17	protein_coding
ENSG00000175984	DENND2C	protein_coding
ENSG00000143127	ITGA10	protein_coding
ENSG00000186844	LCE1A	protein_coding
ENSG00000241794	SPRR2A	protein_coding
ENSG00000203783	PRR9	protein_coding
ENSG00000143549	TPM3	protein_coding
ENSG00000116824	CD2	protein_coding
ENSG00000088035	ALG6	protein_coding
ENSG00000163354	DCST2	protein_coding
ENSG00000163206	SMCP	protein_coding
ENSG00000024526	DEPDC1	protein_coding
ENSG00000273136	NBPF26	protein_coding
ENSG00000162825	NBPF20	protein_coding
ENSG00000169474	SPRR1A	protein_coding
ENSG00000198019	FCGR1B	protein_coding
ENSG00000163352	LENEP	protein_coding
ENSG00000283227	SPRR5	protein_coding
ENSG00000288460	SMIM42	protein_coding
ENSG00000117262	GPR89A	protein_coding
ENSG00000203782	LORICRIN	protein_coding
ENSG00000163263	C1orf189	protein_coding
ENSG00000143624	INTS3	protein_coding
ENSG00000253831	ETV3L	protein_coding
ENSG00000163221	S100A12	protein_coding
ENSG00000271567	PPIAL4E	protein_coding
ENSG00000270629	NBPF14	protein_coding
ENSG00000137947	GTF2B	protein_coding
ENSG00000117586	TNFSF4	protein_coding
ENSG00000239887	C1orf226	protein_coding
ENSG00000184330	S100A7A	protein_coding
ENSG00000014914	MTMR11	protein_coding
ENSG00000162728	KCNJ9	protein_coding
ENSG00000184371	CSF1	protein_coding
ENSG00000143375	CGN	protein_coding
ENSG00000271425	NBPF10	protein_coding
ENSG00000163154	TNFAIP8L2	protein_coding
ENSG00000143569	UBAP2L	protein_coding
ENSG00000184148	SPRR4	protein_coding
ENSG00000196184	OR10J1	protein_coding
ENSG00000162729	IGSF8	protein_coding
ENSG00000143158	MPC2	protein_coding
ENSG00000271092	TLCD4-RWDD3	protein_coding
ENSG00000162739	SLAMF6	protein_coding
ENSG00000203785	SPRR2E	protein_coding
ENSG00000159516	SPRR2G	protein_coding
ENSG00000117281	CD160	protein_coding
ENSG00000000460	C1orf112	protein_coding
ENSG00000188859	FAM78B	protein_coding
ENSG00000264522	OTUD7B	protein_coding
ENSG00000163564	PYHIN1	protein_coding
ENSG00000135862	LAMC1	protein_coding
ENSG00000158473	CD1D	protein_coding
ENSG00000163191	S100A11	protein_coding
ENSG00000215853	RPTN	protein_coding
ENSG00000143198	MGST3	protein_coding
ENSG00000143318	CASQ1	protein_coding
ENSG00000143297	FCRL5	protein_coding
ENSG00000162736	NCSTN	protein_coding
ENSG00000117560	FASLG	protein_coding
ENSG00000135823	STX6	protein_coding
ENSG00000171722	SPATA46	protein_coding
ENSG00000143621	ILF2	protein_coding
ENSG00000143155	TIPRL	protein_coding
ENSG00000143156	NME7	protein_coding
ENSG00000198771	RCSD1	protein_coding
ENSG00000116147	TNR	protein_coding
ENSG00000213064	SFT2D2	protein_coding
ENSG00000143179	UCK2	protein_coding
ENSG00000143315	PIGM	protein_coding
ENSG00000116199	FAM20B	protein_coding
ENSG00000143185	XCL2	protein_coding
ENSG00000007933	FMO3	protein_coding
ENSG00000116260	QSOX1	protein_coding
ENSG00000117475	BLZF1	protein_coding
ENSG00000143340	FAM163A	protein_coding
ENSG00000143190	POU2F1	protein_coding
ENSG00000159348	CYB5R1	protein_coding
ENSG00000075945	KIFAP3	protein_coding
ENSG00000162779	AXDND1	protein_coding
ENSG00000122432	SPATA1	protein_coding
ENSG00000092607	TBX15	protein_coding
ENSG00000117091	CD48	protein_coding
ENSG00000163209	SPRR3	protein_coding
ENSG00000122218	COPA	protein_coding
ENSG00000143171	RXRG	protein_coding
ENSG00000047410	TPR	protein_coding
ENSG00000018625	ATP1A2	protein_coding
ENSG00000171806	METTL18	protein_coding
ENSG00000213088	ACKR1	protein_coding
ENSG00000198574	SH2D1B	protein_coding
ENSG00000134216	CHIA	protein_coding
ENSG00000162694	EXTL2	protein_coding
ENSG00000163207	IVL	protein_coding
ENSG00000132716	DCAF8	protein_coding
ENSG00000183853	KIRREL1	protein_coding
ENSG00000143401	ANP32E	protein_coding
ENSG00000118197	DDX59	protein_coding
ENSG00000135842	NIBAN1	protein_coding
ENSG00000198734	F5	protein_coding
ENSG00000077152	UBE2T	protein_coding
ENSG00000143164	DCAF6	protein_coding
ENSG00000133048	CHI3L1	protein_coding
ENSG00000121454	LHX4	protein_coding
ENSG00000126070	AGO3	protein_coding
ENSG00000184155	OR10J5	protein_coding
ENSG00000163157	TMOD4	protein_coding
ENSG00000117036	ETV3	protein_coding
ENSG00000058085	LAMC2	protein_coding
ENSG00000183155	RABIF	protein_coding
ENSG00000117533	VAMP4	protein_coding
ENSG00000116815	CD58	protein_coding
ENSG00000116741	RGS2	protein_coding
ENSG00000122482	ZNF644	protein_coding
ENSG00000123843	C4BPB	protein_coding
ENSG00000143167	GPA33	protein_coding
ENSG00000143184	XCL1	protein_coding
ENSG00000203685	STUM	protein_coding
ENSG00000131788	PIAS3	protein_coding
ENSG00000171786	NHLH1	protein_coding
ENSG00000177807	KCNJ10	protein_coding
ENSG00000163485	ADORA1	protein_coding
ENSG00000123838	C4BPA	protein_coding
ENSG00000000971	CFH	protein_coding
ENSG00000118200	CAMSAP2	protein_coding
ENSG00000143228	NUF2	protein_coding
ENSG00000174514	MFSD4A	protein_coding
ENSG00000143178	TBX19	protein_coding
ENSG00000162409	PRKAA2	protein_coding
ENSG00000116833	NR5A2	protein_coding
ENSG00000135824	RGS8	protein_coding
ENSG00000000457	SCYL3	protein_coding
ENSG00000143507	DUSP10	protein_coding
ENSG00000198483	ANKRD35	protein_coding
ENSG00000143367	TUFT1	protein_coding
ENSG00000197959	DNM3	protein_coding
ENSG00000133063	CHIT1	protein_coding
ENSG00000180999	C1orf105	protein_coding
ENSG00000203784	LELP1	protein_coding
ENSG00000157064	NMNAT2	protein_coding
ENSG00000203666	EFCAB2	protein_coding
ENSG00000059588	TARBP1	protein_coding
ENSG00000265972	TXNIP	protein_coding
ENSG00000143162	CREG1	protein_coding
ENSG00000159166	LAD1	protein_coding
ENSG00000117153	KLHL12	protein_coding
ENSG00000122224	LY9	protein_coding
ENSG00000131779	PEX11B	protein_coding
ENSG00000162782	TDRD5	protein_coding
ENSG00000162704	ARPC5	protein_coding
ENSG00000143653	SCCPDH	protein_coding
ENSG00000135837	CEP350	protein_coding
ENSG00000117595	IRF6	protein_coding
ENSG00000158711	ELK4	protein_coding
ENSG00000163444	TMEM183A	protein_coding
ENSG00000162851	TFB2M	protein_coding
ENSG00000143353	LYPLAL1	protein_coding
ENSG00000197965	MPZL1	protein_coding
ENSG00000143493	INTS7	protein_coding
ENSG00000179397	CATSPERE	protein_coding
ENSG00000117592	PRDX6	protein_coding
ENSG00000152904	GGPS1	protein_coding
ENSG00000186197	EDARADD	protein_coding
ENSG00000094963	FMO2	protein_coding
ENSG00000162670	BRINP3	protein_coding
ENSG00000159176	CSRP1	protein_coding
ENSG00000162761	LMX1A	protein_coding
ENSG00000143199	ADCY10	protein_coding
ENSG00000117479	SLC19A2	protein_coding
ENSG00000179930	ZNF648	protein_coding
ENSG00000007908	SELE	protein_coding
ENSG00000092978	GPATCH2	protein_coding
ENSG00000143499	SMYD2	protein_coding
ENSG00000163518	FCRL4	protein_coding
ENSG00000188404	SELL	protein_coding
ENSG00000143196	DPT	protein_coding
ENSG00000203697	CAPN8	protein_coding
ENSG00000116574	RHOU	protein_coding
ENSG00000186283	TOR3A	protein_coding
ENSG00000159346	ADIPOR1	protein_coding
ENSG00000160856	FCRL3	protein_coding
ENSG00000121481	RNF2	protein_coding
ENSG00000117139	KDM5B	protein_coding
ENSG00000143248	RGS5	protein_coding
ENSG00000132704	FCRL2	protein_coding
ENSG00000162814	SPATA17	protein_coding
ENSG00000163435	ELF3	protein_coding
ENSG00000116132	PRRX1	protein_coding
ENSG00000116679	IVNS1ABP	protein_coding
ENSG00000162706	CADM3	protein_coding
ENSG00000021852	C8B	protein_coding
ENSG00000152092	ASTN1	protein_coding
ENSG00000143476	DTL	protein_coding
ENSG00000121486	TRMT1L	protein_coding
ENSG00000117594	HSD11B1	protein_coding
ENSG00000057252	SOAT1	protein_coding
ENSG00000123685	BATF3	protein_coding
ENSG00000162852	CNST	protein_coding
ENSG00000143842	SOX13	protein_coding
ENSG00000116962	NID1	protein_coding
ENSG00000159388	BTG2	protein_coding
ENSG00000154380	ENAH	protein_coding
ENSG00000181450	ZNF678	protein_coding
ENSG00000120333	MRPS14	protein_coding
ENSG00000117090	SLAMF1	protein_coding
ENSG00000162753	SLC9C2	protein_coding
ENSG00000264343	NOTCH2NLA	protein_coding
ENSG00000143355	LHX9	protein_coding
ENSG00000117597	UTP25	protein_coding
ENSG00000121644	DESI2	protein_coding
ENSG00000174502	SLC26A9	protein_coding
ENSG00000158715	SLC45A3	protein_coding
ENSG00000143195	ILDR2	protein_coding
ENSG00000162849	KIF26B	protein_coding
ENSG00000067533	RRP15	protein_coding
ENSG00000133055	MYBPH	protein_coding
ENSG00000196071	OR2L13	protein_coding
ENSG00000116209	TMEM59	protein_coding
ENSG00000143643	TTC13	protein_coding
ENSG00000116161	CACYBP	protein_coding
ENSG00000143847	PPFIA4	protein_coding
ENSG00000173627	APOBEC4	protein_coding
ENSG00000067704	IARS2	protein_coding
ENSG00000077157	PPP1R12B	protein_coding
ENSG00000152104	PTPN14	protein_coding
ENSG00000162909	CAPN2	protein_coding
ENSG00000122180	MYOG	protein_coding
ENSG00000117650	NEK2	protein_coding
ENSG00000203724	C1orf53	protein_coding
ENSG00000158764	ITLN2	protein_coding
ENSG00000188783	PRELP	protein_coding
ENSG00000168118	RAB4A	protein_coding
ENSG00000173726	TOMM20	protein_coding
ENSG00000270188	MTRNR2L11	protein_coding
ENSG00000152382	TADA1	protein_coding
ENSG00000143839	REN	protein_coding
ENSG00000187080	OR2AK2	protein_coding
ENSG00000173409	ARV1	protein_coding
ENSG00000143514	TP53BP2	protein_coding
ENSG00000143469	SYT14	protein_coding
ENSG00000135829	DHX9	protein_coding
ENSG00000134717	BTF3L4	protein_coding
ENSG00000116668	SWT1	protein_coding
ENSG00000188610	FAM72B	protein_coding
ENSG00000143756	FBXO28	protein_coding
ENSG00000143702	CEP170	protein_coding
ENSG00000185860	CCDC190	protein_coding
ENSG00000143207	COP1	protein_coding
ENSG00000122176	FMOD	protein_coding
ENSG00000240021	TEX35	protein_coding
ENSG00000026751	SLAMF7	protein_coding
ENSG00000150681	RGS18	protein_coding
ENSG00000116906	GNPAT	protein_coding
ENSG00000092969	TGFB2	protein_coding
ENSG00000163545	NUAK2	protein_coding
ENSG00000157181	ODR4	protein_coding
ENSG00000143153	ATP1B1	protein_coding
ENSG00000120332	TNN	protein_coding
ENSG00000076258	FMO4	protein_coding
ENSG00000117697	NSL1	protein_coding
ENSG00000162669	HFM1	protein_coding
ENSG00000132681	ATP1A4	protein_coding
ENSG00000143641	GALNT2	protein_coding
ENSG00000010932	FMO1	protein_coding
ENSG00000010072	SPRTN	protein_coding
ENSG00000135766	EGLN1	protein_coding
ENSG00000215817	ZC3H11B	protein_coding
ENSG00000163534	FCRL1	protein_coding
ENSG00000143816	WNT9A	protein_coding
ENSG00000168243	GNG4	protein_coding
ENSG00000116183	PAPPA2	protein_coding
ENSG00000116218	NPHS2	protein_coding
ENSG00000270106	TSNAX-DISC1	protein_coding
ENSG00000170382	LRRN2	protein_coding
ENSG00000066027	PPP2R5A	protein_coding
ENSG00000162733	DDR2	protein_coding
ENSG00000117477	CCDC181	protein_coding
ENSG00000188770	OPTC	protein_coding
ENSG00000173728	C1orf100	protein_coding
ENSG00000094975	SUCO	protein_coding
ENSG00000162772	ATF3	protein_coding
ENSG00000135828	RNASEL	protein_coding
ENSG00000076356	PLXNA2	protein_coding
ENSG00000185523	SPATA45	protein_coding
ENSG00000116711	PLA2G4A	protein_coding
ENSG00000143845	ETNK2	protein_coding
ENSG00000069812	HES2	protein_coding
ENSG00000157060	SHCBP1L	protein_coding
ENSG00000009790	TRAF3IP3	protein_coding
ENSG00000116698	SMG7	protein_coding
ENSG00000162813	BPNT1	protein_coding
ENSG00000123684	LPGAT1	protein_coding
ENSG00000117707	PROX1	protein_coding
ENSG00000196482	ESRRG	protein_coding
ENSG00000123836	PFKFB2	protein_coding
ENSG00000117691	NENF	protein_coding
ENSG00000118873	RAB3GAP2	protein_coding
ENSG00000203705	TATDN3	protein_coding
ENSG00000174175	SELP	protein_coding
ENSG00000081237	PTPRC	protein_coding
ENSG00000008118	CAMK1G	protein_coding
ENSG00000171161	ZNF672	protein_coding
ENSG00000117143	UAP1	protein_coding
ENSG00000152332	UHMK1	protein_coding
ENSG00000162757	C1orf74	protein_coding
ENSG00000196878	LAMB3	protein_coding
ENSG00000133059	DSTYK	protein_coding
ENSG00000186007	LEMD1	protein_coding
ENSG00000074964	ARHGEF10L	protein_coding
ENSG00000116918	TSNAX	protein_coding
ENSG00000285053	TBCE	protein_coding
ENSG00000231767	RPS27AP5	protein_coding
ENSG00000198929	NOS1AP	protein_coding
ENSG00000162771	FAM71A	protein_coding
ENSG00000176393	RNPEP	protein_coding
ENSG00000174606	ANGEL2	protein_coding
ENSG00000179914	ITLN1	protein_coding
ENSG00000235750	KIAA0040	protein_coding
ENSG00000121446	RGSL1	protein_coding
ENSG00000123689	G0S2	protein_coding
ENSG00000116903	EXOC8	protein_coding
ENSG00000118194	TNNT2	protein_coding
ENSG00000281406	BLACAT1	protein_coding
ENSG00000143333	RGS16	protein_coding
ENSG00000198626	RYR2	protein_coding
ENSG00000198797	BRINP2	protein_coding
ENSG00000151414	NEK7	protein_coding
ENSG00000177614	PGBD5	protein_coding
ENSG00000183831	ANKRD45	protein_coding
ENSG00000143858	SYT2	protein_coding
ENSG00000197472	ZNF695	protein_coding
ENSG00000188585	CLEC20A	protein_coding
ENSG00000136643	RPS6KC1	protein_coding
ENSG00000133069	TMCC2	protein_coding
ENSG00000162877	PM20D1	protein_coding
ENSG00000135747	ZNF670-ZNF695	protein_coding
ENSG00000069248	NUP133	protein_coding
ENSG00000117791	MTARC2	protein_coding
ENSG00000117724	CENPF	protein_coding
ENSG00000086619	ERO1B	protein_coding
ENSG00000253148	RGS21	protein_coding
ENSG00000090104	RGS1	protein_coding
ENSG00000198700	IPO9	protein_coding
ENSG00000163568	AIM2	protein_coding
ENSG00000159450	TCHH	protein_coding
ENSG00000143322	ABL2	protein_coding
ENSG00000185220	PGBD2	protein_coding
ENSG00000131791	PRKAB2	protein_coding
ENSG00000162769	FLVCR1	protein_coding
ENSG00000133065	SLC41A1	protein_coding
ENSG00000042781	USH2A	protein_coding
ENSG00000277462	ZNF670	protein_coding
ENSG00000035687	ADSS2	protein_coding
ENSG00000182898	TCHHL1	protein_coding
ENSG00000180287	PLD5	protein_coding
ENSG00000077585	GPR137B	protein_coding
ENSG00000136628	EPRS1	protein_coding
ENSG00000163431	LMOD1	protein_coding
ENSG00000135835	KIAA1614	protein_coding
ENSG00000230124	ACBD6	protein_coding
ENSG00000143473	KCNH1	protein_coding
ENSG00000007341	ST7L	protein_coding
ENSG00000134369	NAV1	protein_coding
ENSG00000117222	RBBP5	protein_coding
ENSG00000198216	CACNA1E	protein_coding
ENSG00000143324	XPR1	protein_coding
ENSG00000118193	KIF14	protein_coding
ENSG00000198842	STYXL2	protein_coding
ENSG00000120341	SEC16B	protein_coding
ENSG00000198756	COLGALT2	protein_coding
ENSG00000159173	TNNI1	protein_coding
ENSG00000259823	LYPD8	protein_coding
ENSG00000135749	PCNX2	protein_coding
ENSG00000142875	PRKACB	protein_coding
ENSG00000143786	CNIH3	protein_coding
ENSG00000010165	EEF1AKNMT	protein_coding
ENSG00000054282	SDCCAG8	protein_coding
ENSG00000116406	EDEM3	protein_coding
ENSG00000279782	PPIAL4F	protein_coding
ENSG00000143126	CELSR2	protein_coding
ENSG00000183780	SLC35F3	protein_coding
ENSG00000127481	UBR4	protein_coding
ENSG00000162702	ZNF281	protein_coding
ENSG00000143194	MAEL	protein_coding
ENSG00000174307	PHLDA3	protein_coding
ENSG00000054267	ARID4B	protein_coding
ENSG00000135845	PIGC	protein_coding
ENSG00000175137	SH3BP5L	protein_coding
ENSG00000134245	WNT2B	protein_coding
ENSG00000069275	NUCKS1	protein_coding
ENSG00000143674	MAP3K21	protein_coding
ENSG00000187889	FYB2	protein_coding
ENSG00000134375	TIMM17A	protein_coding
ENSG00000097046	CDC7	protein_coding
ENSG00000232113	TEX50	protein_coding
ENSG00000203667	COX20	protein_coding
ENSG00000263353	PPIAL4A	protein_coding
ENSG00000117114	ADGRL2	protein_coding
ENSG00000203737	GPR52	protein_coding
ENSG00000185420	SMYD3	protein_coding
ENSG00000076321	KLHL20	protein_coding
ENSG00000143575	HAX1	protein_coding
ENSG00000143669	LYST	protein_coding
ENSG00000135778	NTPCR	protein_coding
ENSG00000117280	RAB29	protein_coding
ENSG00000157131	C8A	protein_coding
ENSG00000082497	SERTAD4	protein_coding
ENSG00000136636	KCTD3	protein_coding
ENSG00000163874	ZC3H12A	protein_coding
ENSG00000163346	PBXIP1	protein_coding
ENSG00000054392	HHAT	protein_coding
ENSG00000183291	SELENOF	protein_coding
ENSG00000122223	CD244	protein_coding
ENSG00000117322	CR2	protein_coding
ENSG00000188739	RBM34	protein_coding
ENSG00000163348	PYGO2	protein_coding
ENSG00000135750	KCNK1	protein_coding
ENSG00000203730	TEDDM1	protein_coding
ENSG00000116194	ANGPTL1	protein_coding
ENSG00000137975	CLCA2	protein_coding
ENSG00000153187	HNRNPU	protein_coding
ENSG00000143341	HMCN1	protein_coding
ENSG00000116703	PDC	protein_coding
ENSG00000143149	ALDH9A1	protein_coding
ENSG00000162545	CAMK2N1	protein_coding
ENSG00000090432	MUL1	protein_coding
ENSG00000183114	FAM43B	protein_coding
ENSG00000158825	CDA	protein_coding
ENSG00000158828	PINK1	protein_coding
ENSG00000134371	CDC73	protein_coding
ENSG00000162630	B3GALT2	protein_coding
ENSG00000066557	LRRC40	protein_coding
ENSG00000116754	SRSF11	protein_coding
ENSG00000118454	ANKRD13C	protein_coding
ENSG00000116761	CTH	protein_coding
ENSG00000007968	E2F2	protein_coding
ENSG00000117318	ID3	protein_coding
ENSG00000142676	RPL11	protein_coding
ENSG00000011007	ELOA	protein_coding
ENSG00000057757	PITHD1	protein_coding
ENSG00000011009	LYPLA2	protein_coding
ENSG00000117308	GALE	protein_coding
ENSG00000080910	CFHR2	protein_coding
ENSG00000134389	CFHR5	protein_coding
ENSG00000182901	RGS7	protein_coding
ENSG00000132703	APCS	protein_coding
ENSG00000132693	CRP	protein_coding
ENSG00000158716	DUSP23	protein_coding
ENSG00000181036	FCRL6	protein_coding
ENSG00000158714	SLAMF8	protein_coding
ENSG00000243284	VSIG8	protein_coding
ENSG00000213085	CFAP45	protein_coding
ENSG00000085552	IGSF9	protein_coding
ENSG00000162723	SLAMF9	protein_coding
ENSG00000134668	SPOCD1	protein_coding
ENSG00000163399	ATP1A1	protein_coding
ENSG00000177888	ZBTB41	protein_coding
ENSG00000243364	EFNA4	protein_coding
ENSG00000143590	EFNA3	protein_coding
ENSG00000169242	EFNA1	protein_coding
ENSG00000169241	SLC50A1	protein_coding
ENSG00000163463	KRTCAP2	protein_coding
ENSG00000163462	TRIM46	protein_coding
ENSG00000185499	MUC1	protein_coding
ENSG00000169231	THBS3	protein_coding
ENSG00000177628	GBA	protein_coding
ENSG00000160767	FAM189B	protein_coding
ENSG00000116521	SCAMP3	protein_coding
ENSG00000176444	CLK2	protein_coding
ENSG00000143630	HCN3	protein_coding
ENSG00000143627	PKLR	protein_coding
ENSG00000162594	IL23R	protein_coding
ENSG00000197721	CR1L	protein_coding
ENSG00000117335	CD46	protein_coding
ENSG00000174059	CD34	protein_coding
ENSG00000142657	PGD	protein_coding
ENSG00000251503	CENPS-CORT	protein_coding
ENSG00000175279	CENPS	protein_coding
ENSG00000160049	DFFA	protein_coding
ENSG00000081985	IL12RB2	protein_coding
ENSG00000122188	LAX1	protein_coding
ENSG00000257315	ZBED6	protein_coding
ENSG00000182004	SNRPE	protein_coding
ENSG00000130768	SMPDL3B	protein_coding
ENSG00000158156	XKR8	protein_coding
ENSG00000182118	FAM89A	protein_coding
ENSG00000143633	C1orf131	protein_coding
ENSG00000132773	TOE1	protein_coding
ENSG00000070759	TESK2	protein_coding
ENSG00000280670	CCDC163	protein_coding
ENSG00000132763	MMACHC	protein_coding
ENSG00000169224	GCSAML	protein_coding
ENSG00000177489	OR2G2	protein_coding
ENSG00000177476	OR2G3	protein_coding
ENSG00000162711	NLRP3	protein_coding
ENSG00000133019	CHRM3	protein_coding
ENSG00000162636	FAM102B	protein_coding
ENSG00000162639	HENMT1	protein_coding
ENSG00000134186	PRPF38B	protein_coding
ENSG00000143107	FNDC7	protein_coding
ENSG00000116266	STXBP3	protein_coding
ENSG00000162641	AKNAD1	protein_coding
ENSG00000197780	TAF13	protein_coding
ENSG00000215717	TMEM167B	protein_coding
ENSG00000198452	OR14L1P	protein_coding
ENSG00000132676	DAP3	protein_coding
ENSG00000132718	SYT11	protein_coding
ENSG00000143622	RIT1	protein_coding
ENSG00000132680	KHDC4	protein_coding
ENSG00000116584	ARHGEF2	protein_coding
ENSG00000163479	SSR2	protein_coding
ENSG00000160803	UBQLN4	protein_coding
ENSG00000116586	LAMTOR2	protein_coding
ENSG00000132698	RAB25	protein_coding
ENSG00000196189	SEMA4A	protein_coding
ENSG00000260238	PMF1-BGLAP	protein_coding
ENSG00000160783	PMF1	protein_coding
ENSG00000242252	BGLAP	protein_coding
ENSG00000198952	SMG5	protein_coding
ENSG00000163472	TMEM79	protein_coding
ENSG00000198715	GLMP	protein_coding
ENSG00000163468	CCT3	protein_coding
ENSG00000132677	RHBG	protein_coding
ENSG00000254726	MEX3A	protein_coding
ENSG00000186377	CYP4X1	protein_coding
ENSG00000186160	CYP4Z1	protein_coding
ENSG00000162365	CYP4A22	protein_coding
ENSG00000162366	PDZK1IP1	protein_coding
ENSG00000162367	TAL1	protein_coding
ENSG00000186790	FOXE3	protein_coding
ENSG00000116701	NCF2	protein_coding
ENSG00000196352	CD55	protein_coding
ENSG00000211452	DIO1	protein_coding
ENSG00000189030	VHLL	protein_coding
ENSG00000162763	LRRC52	protein_coding
ENSG00000081277	PKP1	protein_coding
ENSG00000143061	IGSF3	protein_coding
ENSG00000197915	HRNR	protein_coding
ENSG00000004487	KDM1A	protein_coding
ENSG00000179172	HNRNPCL1	protein_coding
ENSG00000135821	GLUL	protein_coding
ENSG00000160691	SHC1	protein_coding
ENSG00000203740	METTL11B	protein_coding
ENSG00000162374	ELAVL4	protein_coding
ENSG00000168275	COA6	protein_coding
ENSG00000241563	CORT	protein_coding
ENSG00000153207	AHCTF1	protein_coding
ENSG00000250719	P3R3URF	protein_coding
ENSG00000156869	FRRS1	protein_coding
ENSG00000033122	LRRC7	protein_coding
ENSG00000151418	ATP6V1G3	protein_coding
ENSG00000143278	F13B	protein_coding
ENSG00000116678	LEPR	protein_coding
ENSG00000185630	PBX1	protein_coding
ENSG00000159352	PSMD4	protein_coding
ENSG00000158710	TAGLN2	protein_coding
ENSG00000162734	PEA15	protein_coding
ENSG00000066294	CD84	protein_coding
ENSG00000049239	H6PD	protein_coding
ENSG00000186564	FOXD2	protein_coding
ENSG00000265241	RBM8A	protein_coding
ENSG00000244038	DDOST	protein_coding
ENSG00000158747	NBL1	protein_coding
ENSG00000116690	PRG4	protein_coding
ENSG00000163159	VPS72	protein_coding
ENSG00000126091	ST3GAL3	protein_coding
ENSG00000162383	SLC1A7	protein_coding
ENSG00000171163	ZNF692	protein_coding
ENSG00000127054	INTS11	protein_coding
ENSG00000172456	FGGY	protein_coding
ENSG00000162946	DISC1	protein_coding
ENSG00000196660	SLC30A10	protein_coding
ENSG00000158786	PLA2G2F	protein_coding
ENSG00000168389	MFSD2A	protein_coding
ENSG00000160087	UBE2J2	protein_coding
ENSG00000118733	OLFM3	protein_coding
ENSG00000157870	PRXL2B	protein_coding
ENSG00000163357	DCST1	protein_coding
ENSG00000179085	DPM3	protein_coding
ENSG00000155366	RHOC	protein_coding
ENSG00000173080	RXFP4	protein_coding
ENSG00000188782	CATSPER4	protein_coding
ENSG00000198892	SHISA4	protein_coding
ENSG00000158055	GRHL3	protein_coding
ENSG00000183347	GBP6	protein_coding
ENSG00000175206	NPPA	protein_coding
ENSG00000120937	NPPB	protein_coding
ENSG00000116685	KIAA2013	protein_coding
ENSG00000083444	PLOD1	protein_coding
ENSG00000116691	MIIP	protein_coding
ENSG00000120949	TNFRSF8	protein_coding
ENSG00000162521	RBBP4	protein_coding
ENSG00000162520	SYNC	protein_coding
ENSG00000162522	KIAA1522	protein_coding
ENSG00000116497	S100PBP	protein_coding
ENSG00000160097	FNDC5	protein_coding
ENSG00000121905	HPCA	protein_coding
ENSG00000121900	TMEM54	protein_coding
ENSG00000121940	CLCC1	protein_coding
ENSG00000143222	UFC1	protein_coding
ENSG00000143258	USP21	protein_coding
ENSG00000143224	PPOX	protein_coding
ENSG00000158850	B4GALT3	protein_coding
ENSG00000158859	ADAMTS4	protein_coding
ENSG00000158869	FCER1G	protein_coding
ENSG00000158874	APOA2	protein_coding
ENSG00000158882	TOMM40L	protein_coding
ENSG00000143257	NR1I3	protein_coding
ENSG00000248485	PCP4L1	protein_coding
ENSG00000188931	CFAP126	protein_coding
ENSG00000265107	GJA5	protein_coding
ENSG00000121634	GJA8	protein_coding
ENSG00000188092	GPR89B	protein_coding
ENSG00000116991	SIPA1L2	protein_coding
ENSG00000116688	MFN2	protein_coding
ENSG00000188800	TMCO2	protein_coding
ENSG00000084073	ZMPSTE24	protein_coding
ENSG00000049089	COL9A2	protein_coding
ENSG00000084070	SMAP2	protein_coding
ENSG00000187801	ZFP69B	protein_coding
ENSG00000158887	MPZ	protein_coding
ENSG00000117640	MTFR1L	protein_coding
ENSG00000127423	AUNIP	protein_coding
ENSG00000182749	PAQR7	protein_coding
ENSG00000117632	STMN1	protein_coding
ENSG00000187147	RNF220	protein_coding
ENSG00000126106	TMEM53	protein_coding
ENSG00000198520	ARMH1	protein_coding
ENSG00000142945	KIF2C	protein_coding
ENSG00000142937	RPS8	protein_coding
ENSG00000142959	BEST4	protein_coding
ENSG00000173846	PLK3	protein_coding
ENSG00000222009	BTBD19	protein_coding
ENSG00000117425	PTCH2	protein_coding
ENSG00000070785	EIF2B3	protein_coding
ENSG00000126107	HECTD3	protein_coding
ENSG00000126088	UROD	protein_coding
ENSG00000162408	NOL9	protein_coding
ENSG00000173662	TAS1R1	protein_coding
ENSG00000204859	ZBTB48	protein_coding
ENSG00000171488	LRRC8C	protein_coding
ENSG00000070886	EPHA8	protein_coding
ENSG00000173372	C1QA	protein_coding
ENSG00000159189	C1QC	protein_coding
ENSG00000173369	C1QB	protein_coding
ENSG00000119285	HEATR1	protein_coding
ENSG00000244020	MT1HL1	protein_coding
ENSG00000117758	STX12	protein_coding
ENSG00000117751	PPP1R8	protein_coding
ENSG00000130775	THEMIS2	protein_coding
ENSG00000117748	RPA2	protein_coding
ENSG00000117122	MFAP2	protein_coding
ENSG00000159363	ATP13A2	protein_coding
ENSG00000117118	SDHB	protein_coding
ENSG00000117115	PADI2	protein_coding
ENSG00000142623	PADI1	protein_coding
ENSG00000142619	PADI3	protein_coding
ENSG00000142871	CCN1	protein_coding
ENSG00000143512	HHIPL2	protein_coding
ENSG00000143498	TAF1A	protein_coding
ENSG00000154305	MIA3	protein_coding
ENSG00000186063	AIDA	protein_coding
ENSG00000162819	BROX	protein_coding
ENSG00000197520	FAM177B	protein_coding
ENSG00000187554	TLR5	protein_coding
ENSG00000164010	ERMAP	protein_coding
ENSG00000164011	ZNF691	protein_coding
ENSG00000154309	DISP1	protein_coding
ENSG00000120370	GORAB	protein_coding
ENSG00000203857	HSD3B1	protein_coding
ENSG00000143067	ZNF697	protein_coding
ENSG00000134240	HMGCS2	protein_coding
ENSG00000134193	REG4	protein_coding
ENSG00000134249	ADAM30	protein_coding
ENSG00000092621	PHGDH	protein_coding
ENSG00000027644	INSRR	protein_coding
ENSG00000130764	LRRC47	protein_coding
ENSG00000284770	TBCE	protein_coding
ENSG00000197587	DMBX1	protein_coding
ENSG00000198837	DENND4B	protein_coding
ENSG00000160741	CRTC2	protein_coding
ENSG00000143578	CREB3L4	protein_coding
ENSG00000143543	JTB	protein_coding
ENSG00000143545	RAB13	protein_coding
ENSG00000177954	RPS27	protein_coding
ENSG00000162642	C1orf52	protein_coding
ENSG00000142867	BCL10	protein_coding
ENSG00000117394	SLC2A1	protein_coding
ENSG00000116198	CEP104	protein_coding
ENSG00000169598	DFFB	protein_coding
ENSG00000162836	ACP6	protein_coding
ENSG00000116667	C1orf21	protein_coding
ENSG00000125945	ZNF436	protein_coding
ENSG00000204219	TCEA3	protein_coding
ENSG00000162885	B3GALNT2	protein_coding
ENSG00000173110	HSPA6	protein_coding
ENSG00000162747	FCGR3B	protein_coding
ENSG00000072694	FCGR2B	protein_coding
ENSG00000143226	FCGR2A	protein_coding
ENSG00000143125	PROK1	protein_coding
ENSG00000143105	KCNA10	protein_coding
ENSG00000177272	KCNA3	protein_coding
ENSG00000177301	KCNA2	protein_coding
ENSG00000179456	ZBTB18	protein_coding
ENSG00000160753	RUSC1	protein_coding
ENSG00000125459	MSTO1	protein_coding
ENSG00000160752	FDPS	protein_coding
ENSG00000121957	GPSM2	protein_coding
ENSG00000188396	DYNLT4	protein_coding
ENSG00000082482	KCNK2	protein_coding
ENSG00000143612	C1orf43	protein_coding
ENSG00000078618	NRDC	protein_coding
ENSG00000116747	RO60	protein_coding
ENSG00000118729	CASQ2	protein_coding
ENSG00000134207	SYT6	protein_coding
ENSG00000163467	TSACC	protein_coding
ENSG00000243710	CFAP57	protein_coding
ENSG00000117395	EBNA1BP2	protein_coding
ENSG00000120942	UBIAD1	protein_coding
ENSG00000116874	WARS2	protein_coding
ENSG00000065600	PACC1	protein_coding
ENSG00000162576	MXRA8	protein_coding
ENSG00000143006	DMRTB1	protein_coding
ENSG00000009780	FAM76A	protein_coding
ENSG00000023572	GLRX2	protein_coding
ENSG00000132694	ARHGEF11	protein_coding
ENSG00000077254	USP33	protein_coding
ENSG00000143537	ADAM15	protein_coding
ENSG00000134644	PUM1	protein_coding
ENSG00000215788	TNFRSF25	protein_coding
ENSG00000143434	SEMA6C	protein_coding
ENSG00000266472	MRPS21	protein_coding
ENSG00000117834	SLC5A9	protein_coding
ENSG00000117625	RCOR3	protein_coding
ENSG00000179902	C1orf194	protein_coding
ENSG00000020633	RUNX3	protein_coding
ENSG00000121766	ZCCHC17	protein_coding
ENSG00000143157	POGK	protein_coding
ENSG00000160058	BSDC1	protein_coding
ENSG00000162873	KLHDC8A	protein_coding
ENSG00000162614	NEXN	protein_coding
ENSG00000160781	PAQR6	protein_coding
ENSG00000143344	RGL1	protein_coding
ENSG00000142748	FCN3	protein_coding
ENSG00000162613	FUBP1	protein_coding
ENSG00000116882	HAO2	protein_coding
ENSG00000198758	EPS8L3	protein_coding
ENSG00000049247	UTS2	protein_coding
ENSG00000132849	PATJ	protein_coding
ENSG00000117569	PTBP2	protein_coding
ENSG00000142856	ITGB3BP	protein_coding
ENSG00000158022	TRIM63	protein_coding
ENSG00000116396	KCNC4	protein_coding
ENSG00000058668	ATP2B4	protein_coding
ENSG00000163875	MEAF6	protein_coding
ENSG00000116726	PRAMEF12	protein_coding
ENSG00000282872	C1orf232	protein_coding
ENSG00000198821	CD247	protein_coding
ENSG00000162735	PEX19	protein_coding
ENSG00000179163	FUCA1	protein_coding
ENSG00000131238	PPT1	protein_coding
ENSG00000171680	PLEKHG5	protein_coding
ENSG00000075391	RASAL2	protein_coding
ENSG00000116977	LGALS8	protein_coding
ENSG00000221978	CCNL2	protein_coding
ENSG00000242485	MRPL20	protein_coding
ENSG00000179403	VWA1	protein_coding
ENSG00000215915	ATAD3C	protein_coding
ENSG00000135776	ABCB10	protein_coding
ENSG00000135763	URB2	protein_coding
ENSG00000135801	TAF5L	protein_coding
ENSG00000178828	RNF186	protein_coding
ENSG00000169914	OTUD3	protein_coding
ENSG00000188784	PLA2G2E	protein_coding
ENSG00000188257	PLA2G2A	protein_coding
ENSG00000177186	OR2M7	protein_coding
ENSG00000177174	OR14C36	protein_coding
ENSG00000282881	TMEM275	protein_coding
ENSG00000162456	KNCN	protein_coding
ENSG00000079277	MKNK1	protein_coding
ENSG00000142961	MOB3C	protein_coding
ENSG00000117407	ARTN	protein_coding
ENSG00000117408	IPO13	protein_coding
ENSG00000132768	DPH2	protein_coding
ENSG00000117410	ATP6V0B	protein_coding
ENSG00000159214	CCDC24	protein_coding
ENSG00000196517	SLC6A9	protein_coding
ENSG00000175143	OR2T1	protein_coding
ENSG00000196539	OR2T3	protein_coding
ENSG00000203661	OR2T5	protein_coding
ENSG00000183310	OR2T34	protein_coding
ENSG00000189181	OR14I1	protein_coding
ENSG00000187238	LCE3B	protein_coding
ENSG00000185962	LCE3A	protein_coding
ENSG00000187223	LCE2D	protein_coding
ENSG00000187180	LCE2C	protein_coding
ENSG00000159455	LCE2B	protein_coding
ENSG00000187173	LCE2A	protein_coding
ENSG00000204501	PRAMEF15	protein_coding
ENSG00000204481	PRAMEF14	protein_coding
ENSG00000204480	PRAMEF19	protein_coding
ENSG00000204479	PRAMEF17	protein_coding
ENSG00000204478	PRAMEF20	protein_coding
ENSG00000172031	EPHX4	protein_coding
ENSG00000230667	SETSIP	protein_coding
ENSG00000228594	FNDC10	protein_coding
ENSG00000189409	MMP23B	protein_coding
ENSG00000189339	SLC35E2B	protein_coding
ENSG00000008128	CDK11A	protein_coding
ENSG00000008130	NADK	protein_coding
ENSG00000078369	GNB1	protein_coding
ENSG00000169885	CALML6	protein_coding
ENSG00000178821	TMEM52	protein_coding
ENSG00000158477	CD1A	protein_coding
ENSG00000158481	CD1C	protein_coding
ENSG00000158485	CD1B	protein_coding
ENSG00000158488	CD1E	protein_coding
ENSG00000186306	OR10T2	protein_coding
ENSG00000117505	DR1	protein_coding
ENSG00000162889	MAPKAPK2	protein_coding
ENSG00000136634	IL10	protein_coding
ENSG00000162892	IL24	protein_coding
ENSG00000162894	FCMR	protein_coding
ENSG00000162896	PIGR	protein_coding
ENSG00000162897	FCAMR	protein_coding
ENSG00000182795	C1orf116	protein_coding
ENSG00000198890	PRMT6	protein_coding
ENSG00000142669	SH3BGRL3	protein_coding
ENSG00000158062	UBXN11	protein_coding
ENSG00000169442	CD52	protein_coding
ENSG00000176083	ZNF683	protein_coding
ENSG00000142910	TINAGL1	protein_coding
ENSG00000121764	HCRTR1	protein_coding
ENSG00000162517	PEF1	protein_coding
ENSG00000084636	COL16A1	protein_coding
ENSG00000085840	ORC1	protein_coding
ENSG00000203747	FCGR3A	protein_coding
ENSG00000142224	IL19	protein_coding
ENSG00000143751	SDE2	protein_coding
ENSG00000163041	H3-3A	protein_coding
ENSG00000182827	ACBD3	protein_coding
ENSG00000185155	MIXL1	protein_coding
ENSG00000143753	DEGS1	protein_coding
ENSG00000143748	NVL	protein_coding
ENSG00000143771	CNIH4	protein_coding
ENSG00000183682	BMP8A	protein_coding
ENSG00000163909	HEYL	protein_coding
ENSG00000116983	HPCAL4	protein_coding
ENSG00000090621	PABPC4	protein_coding
ENSG00000143374	TARS2	protein_coding
ENSG00000143369	ECM1	protein_coding
ENSG00000143420	ENSA	protein_coding
ENSG00000143457	GOLPH3L	protein_coding
ENSG00000143452	HORMAD1	protein_coding
ENSG00000143384	MCL1	protein_coding
ENSG00000154342	WNT3A	protein_coding
ENSG00000143761	ARF1	protein_coding
ENSG00000143793	C1orf35	protein_coding
ENSG00000162910	MRPL55	protein_coding
ENSG00000198835	GJC2	protein_coding
ENSG00000181873	IBA57	protein_coding
ENSG00000154370	TRIM11	protein_coding
ENSG00000162931	TRIM17	protein_coding
ENSG00000168148	H3-4	protein_coding
ENSG00000181218	H2AW	protein_coding
ENSG00000196890	H2BU1	protein_coding
ENSG00000168159	RNF187	protein_coding
ENSG00000171960	PPIH	protein_coding
ENSG00000065978	YBX1	protein_coding
ENSG00000164007	CLDN19	protein_coding
ENSG00000117385	P3H1	protein_coding
ENSG00000164008	C1orf50	protein_coding
ENSG00000001460	STPG1	protein_coding
ENSG00000001461	NIPAL3	protein_coding
ENSG00000117602	RCAN3	protein_coding
ENSG00000184454	NCMAP	protein_coding
ENSG00000177606	JUN	protein_coding
ENSG00000116539	ASH1L	protein_coding
ENSG00000162923	WDR26	protein_coding
ENSG00000084652	TXLNA	protein_coding
ENSG00000160051	IQCC	protein_coding
ENSG00000160055	TMEM234	protein_coding
ENSG00000183615	FAM167B	protein_coding
ENSG00000182866	LCK	protein_coding
ENSG00000116478	HDAC1	protein_coding
ENSG00000175130	MARCKSL1	protein_coding
ENSG00000162526	TSSK3	protein_coding
ENSG00000225828	FAM229A	protein_coding
ENSG00000168679	SLC16A4	protein_coding
ENSG00000084623	EIF3I	protein_coding
ENSG00000134248	LAMTOR5	protein_coding
ENSG00000198492	YTHDF2	protein_coding
ENSG00000116329	OPRD1	protein_coding
ENSG00000253304	TMEM200B	protein_coding
ENSG00000116350	SRSF4	protein_coding
ENSG00000116353	MECR	protein_coding
ENSG00000186205	MTARC1	protein_coding
ENSG00000136630	HLX	protein_coding
ENSG00000116141	MARK1	protein_coding
ENSG00000162817	C1orf115	protein_coding
ENSG00000117593	DARS2	protein_coding
ENSG00000185278	ZBTB37	protein_coding
ENSG00000135870	RC3H1	protein_coding
ENSG00000197852	INKA2	protein_coding
ENSG00000171385	KCND3	protein_coding
ENSG00000276600	RAB7B	protein_coding
ENSG00000158769	F11R	protein_coding
ENSG00000215845	TSTD1	protein_coding
ENSG00000158773	USF1	protein_coding
ENSG00000186517	ARHGAP30	protein_coding
ENSG00000143217	NECTIN4	protein_coding
ENSG00000162755	KLHDC9	protein_coding
ENSG00000143256	PFDN2	protein_coding
ENSG00000158793	NIT1	protein_coding
ENSG00000158796	DEDD	protein_coding
ENSG00000196188	CTSE	protein_coding
ENSG00000163050	COQ8A	protein_coding
ENSG00000174574	AKIRIN1	protein_coding
ENSG00000168653	NDUFS5	protein_coding
ENSG00000121931	LRIF1	protein_coding
ENSG00000134255	CEPT1	protein_coding
ENSG00000162777	DENND2D	protein_coding
ENSG00000064886	CHI3L2	protein_coding
ENSG00000156171	DRAM2	protein_coding
ENSG00000143515	ATP8B2	protein_coding
ENSG00000160712	IL6R	protein_coding
ENSG00000169291	SHE	protein_coding
ENSG00000187980	PLA2G2C	protein_coding
ENSG00000162543	UBXN10	protein_coding
ENSG00000143252	SDHC	protein_coding
ENSG00000143437	ARNT	protein_coding
ENSG00000283324	CTXND2	protein_coding
ENSG00000143799	PARP1	protein_coding
ENSG00000158864	NDUFS2	protein_coding
ENSG00000117450	PRDX1	protein_coding
ENSG00000132780	NASP	protein_coding
ENSG00000159588	CCDC17	protein_coding
ENSG00000159592	GPBP1L1	protein_coding
ENSG00000159596	TMEM69	protein_coding
ENSG00000143570	SLC39A1	protein_coding
ENSG00000203710	CR1	protein_coding
ENSG00000143774	GUK1	protein_coding
ENSG00000142864	SERBP1	protein_coding
ENSG00000143390	RFX5	protein_coding
ENSG00000198160	MIER1	protein_coding
ENSG00000162426	SLC45A1	protein_coding
ENSG00000117245	KIF17	protein_coding
ENSG00000236334	PPIAL4G	protein_coding
ENSG00000085433	WDR47	protein_coding
ENSG00000188295	ZNF669	protein_coding
ENSG00000117155	SSX2IP	protein_coding
ENSG00000169905	TOR1AIP2	protein_coding
ENSG00000116750	UCHL5	protein_coding
ENSG00000235169	SMIM1	protein_coding
ENSG00000116514	RNF19B	protein_coding
ENSG00000143110	C1orf162	protein_coding
ENSG00000162419	GMEB1	protein_coding
ENSG00000130695	CEP85	protein_coding
ENSG00000154222	CC2D1B	protein_coding
ENSG00000173406	DAB1	protein_coding
ENSG00000197147	LRRC8B	protein_coding
ENSG00000189195	BTBD8	protein_coding
ENSG00000058673	ZC3H11A	protein_coding
ENSG00000163565	IFI16	protein_coding
ENSG00000127074	RGS13	protein_coding
ENSG00000117152	RGS4	protein_coding
ENSG00000131236	CAP1	protein_coding
ENSG00000097021	ACOT7	protein_coding
ENSG00000143337	TOR1AIP1	protein_coding
ENSG00000081870	HSPB11	protein_coding
ENSG00000078808	SDF4	protein_coding
ENSG00000133216	EPHB2	protein_coding
ENSG00000143183	TMCO1	protein_coding
ENSG00000142794	NBPF3	protein_coding
ENSG00000248333	CDK11B	protein_coding
ENSG00000162390	ACOT11	protein_coding
ENSG00000117448	AKR1A1	protein_coding
ENSG00000162687	KCNT2	protein_coding
ENSG00000143387	CTSK	protein_coding
ENSG00000159023	EPB41	protein_coding
ENSG00000176256	HMGB4	protein_coding
ENSG00000004455	AK2	protein_coding
ENSG00000142920	AZIN2	protein_coding
ENSG00000116525	TRIM62	protein_coding
ENSG00000185888	PRSS38	protein_coding
ENSG00000163131	CTSS	protein_coding
ENSG00000183814	LIN9	protein_coding
ENSG00000274764	PRAMEF27	protein_coding
ENSG00000229571	PRAMEF25	protein_coding
ENSG00000275774	HNRNPCL2	protein_coding
ENSG00000280267	PRAMEF26	protein_coding
ENSG00000179412	HNRNPCL4	protein_coding
ENSG00000213516	RBMXL1	protein_coding
ENSG00000117226	GBP3	protein_coding
ENSG00000117228	GBP1	protein_coding
ENSG00000162645	GBP2	protein_coding
ENSG00000213512	GBP7	protein_coding
ENSG00000162654	GBP4	protein_coding
ENSG00000126705	AHDC1	protein_coding
ENSG00000000938	FGR	protein_coding
ENSG00000126709	IFI6	protein_coding
ENSG00000277058	HNRNPCL3	protein_coding
ENSG00000137959	IFI44L	protein_coding
ENSG00000174151	CYB561D1	protein_coding
ENSG00000181754	AMIGO1	protein_coding
ENSG00000156097	GPR61	protein_coding
ENSG00000065135	GNAI3	protein_coding
ENSG00000168765	GSTM4	protein_coding
ENSG00000134183	GNAT2	protein_coding
ENSG00000073756	PTGS2	protein_coding
ENSG00000153904	DDAH1	protein_coding
ENSG00000155380	SLC16A1	protein_coding
ENSG00000134259	NGF	protein_coding
ENSG00000188976	NOC2L	protein_coding
ENSG00000187961	KLHL17	protein_coding
ENSG00000187583	PLEKHN1	protein_coding
ENSG00000187642	PERM1	protein_coding
ENSG00000188290	HES4	protein_coding
ENSG00000187608	ISG15	protein_coding
ENSG00000188157	AGRN	protein_coding
ENSG00000157211	CDCP2	protein_coding
ENSG00000116221	MRPL37	protein_coding
ENSG00000157216	SSBP3	protein_coding
ENSG00000117601	SERPINC1	protein_coding
ENSG00000135775	COG2	protein_coding
ENSG00000135773	CAPN9	protein_coding
ENSG00000119280	C1orf198	protein_coding
ENSG00000135744	AGT	protein_coding
ENSG00000137965	IFI44	protein_coding
ENSG00000163239	TDRD10	protein_coding
ENSG00000160714	UBE2Q1	protein_coding
ENSG00000160716	CHRNB2	protein_coding
ENSG00000160710	ADAR	protein_coding
ENSG00000123472	ATPAF1	protein_coding
ENSG00000186118	TEX38	protein_coding
ENSG00000159658	EFCAB14	protein_coding
ENSG00000142973	CYP4B1	protein_coding
ENSG00000143801	PSEN2	protein_coding
ENSG00000132185	FCRLA	protein_coding
ENSG00000162746	FCRLB	protein_coding
ENSG00000081721	DUSP12	protein_coding
ENSG00000082512	TRAF5	protein_coding
ENSG00000170385	SLC30A1	protein_coding
ENSG00000198570	RD3	protein_coding
ENSG00000118217	ATF6	protein_coding
ENSG00000117054	ACADM	protein_coding
ENSG00000137955	RABGGTB	protein_coding
ENSG00000057468	MSH4	protein_coding
ENSG00000213047	DENND1B	protein_coding
ENSG00000134376	CRB1	protein_coding
ENSG00000117400	MPL	protein_coding
ENSG00000117399	CDC20	protein_coding
ENSG00000066322	ELOVL1	protein_coding
ENSG00000159479	MED8	protein_coding
ENSG00000116337	AMPD2	protein_coding
ENSG00000066279	ASPM	protein_coding
ENSG00000117020	AKT3	protein_coding
ENSG00000198912	C1orf174	protein_coding
ENSG00000116604	MEF2D	protein_coding
ENSG00000183856	IQGAP3	protein_coding
ENSG00000163382	NAXE	protein_coding
ENSG00000160818	GPATCH4	protein_coding
ENSG00000132702	HAPLN2	protein_coding
ENSG00000132692	BCAN	protein_coding
ENSG00000132688	NES	protein_coding
ENSG00000143320	CRABP2	protein_coding
ENSG00000143319	ISG20L2	protein_coding
ENSG00000143303	RRNAD1	protein_coding
ENSG00000143314	MRPL24	protein_coding
ENSG00000143321	HDGF	protein_coding
ENSG00000143294	PRCC	protein_coding
ENSG00000027869	SH2D2A	protein_coding
ENSG00000204006	C1orf185	protein_coding
ENSG00000123091	RNF11	protein_coding
ENSG00000085832	EPS15	protein_coding
ENSG00000237330	RNF223	protein_coding
ENSG00000131591	C1orf159	protein_coding
ENSG00000085831	TTC39A	protein_coding
ENSG00000187634	SAMD11	protein_coding
ENSG00000156875	MFSD14A	protein_coding
ENSG00000156876	SASS6	protein_coding
ENSG00000122435	TRMT13	protein_coding
ENSG00000122477	LRRC39	protein_coding
ENSG00000137992	DBT	protein_coding
ENSG00000137996	RTCA	protein_coding
ENSG00000137948	BRDT	protein_coding
ENSG00000121774	KHDRBS1	protein_coding
ENSG00000121775	TMEM39B	protein_coding
ENSG00000025800	KPNA6	protein_coding
ENSG00000160050	CCDC28B	protein_coding
ENSG00000064703	DDX20	protein_coding
ENSG00000122406	RPL5	protein_coding
ENSG00000154511	DIPK1A	protein_coding
ENSG00000143033	MTF2	protein_coding
ENSG00000189410	SH2D5	protein_coding
ENSG00000127483	HP1BP3	protein_coding
ENSG00000117298	ECE1	protein_coding
ENSG00000143502	SUSD4	protein_coding
ENSG00000178395	CCDC185	protein_coding
ENSG00000162620	LRRIQ3	protein_coding
ENSG00000116783	TNNI3K	protein_coding
ENSG00000162621	LRRC53	protein_coding
ENSG00000178965	ERICH3	protein_coding
ENSG00000116791	CRYZ	protein_coding
ENSG00000162623	TYW3	protein_coding
ENSG00000259030	FPGT-TNNI3K	protein_coding
ENSG00000154358	OBSCN	protein_coding
ENSG00000263464	PPIAL4C	protein_coding
ENSG00000203814	H2BC18	protein_coding
ENSG00000183598	H3C13	protein_coding
ENSG00000270882	H4C14	protein_coding
ENSG00000203811	H3C14	protein_coding
ENSG00000203812	H2AC18	protein_coding
ENSG00000272196	H2AC19	protein_coding
ENSG00000203852	H3C15	protein_coding
ENSG00000270276	H4C15	protein_coding
ENSG00000184678	H2BC21	protein_coding
ENSG00000184260	H2AC20	protein_coding
ENSG00000184270	H2AC21	protein_coding
ENSG00000178096	BOLA1	protein_coding
ENSG00000159164	SV2A	protein_coding
ENSG00000143368	SF3B4	protein_coding
ENSG00000150337	FCGR1A	protein_coding
ENSG00000170128	GPR25	protein_coding
ENSG00000163362	INAVA	protein_coding
ENSG00000116852	KIF21B	protein_coding
ENSG00000116857	TMEM9	protein_coding
ENSG00000163395	IGFN1	protein_coding
ENSG00000081248	CACNA1S	protein_coding
ENSG00000203943	SAMD13	protein_coding
ENSG00000174529	TMEM81	protein_coding
ENSG00000116984	MTR	protein_coding
ENSG00000143742	SRP9	protein_coding
ENSG00000196187	TMEM63A	protein_coding
ENSG00000243709	LEFTY1	protein_coding
ENSG00000143811	PYCR2	protein_coding
ENSG00000143768	LEFTY2	protein_coding
ENSG00000143819	EPHX1	protein_coding
ENSG00000120948	TARDBP	protein_coding
ENSG00000009724	MASP2	protein_coding
ENSG00000116649	SRM	protein_coding
ENSG00000171824	EXOSC10	protein_coding
ENSG00000117614	SYF2	protein_coding
ENSG00000117616	RSRP1	protein_coding
ENSG00000187010	RHD	protein_coding
ENSG00000183726	TMEM50A	protein_coding
ENSG00000188672	RHCE	protein_coding
ENSG00000204178	MACO1	protein_coding
ENSG00000198860	TSEN15	protein_coding
ENSG00000160838	LRRC71	protein_coding
ENSG00000198400	NTRK1	protein_coding
ENSG00000155816	FMN2	protein_coding
ENSG00000180875	GREM2	protein_coding
ENSG00000134684	YARS1	protein_coding
ENSG00000125944	HNRNPR	protein_coding
ENSG00000143382	ADAMTSL4	protein_coding
ENSG00000184007	PTP4A2	protein_coding
ENSG00000116580	GON4L	protein_coding
ENSG00000176092	CRYBG2	protein_coding
ENSG00000137942	FNBP1L	protein_coding
ENSG00000157077	ZFYVE9	protein_coding
ENSG00000162493	PDPN	protein_coding
ENSG00000162542	TMCO4	protein_coding
ENSG00000178922	HYI	protein_coding
ENSG00000121753	ADGRB2	protein_coding
ENSG00000162631	NTNG1	protein_coding
ENSG00000163374	YY1AP1	protein_coding
ENSG00000235098	ANKRD65	protein_coding
ENSG00000143740	SNAP47	protein_coding
ENSG00000117411	B4GALT2	protein_coding
ENSG00000162745	OLFML2B	protein_coding
ENSG00000187862	TTC24	protein_coding
ENSG00000162891	IL20	protein_coding
ENSG00000204518	AADACL4	protein_coding
ENSG00000137976	DNASE2B	protein_coding
ENSG00000203663	OR2L2	protein_coding
ENSG00000198128	OR2L3	protein_coding
ENSG00000171180	OR2M4	protein_coding
ENSG00000186501	TMEM222	protein_coding
ENSG00000133067	LGR6	protein_coding
ENSG00000185090	MANEAL	protein_coding
ENSG00000157873	TNFRSF14	protein_coding
ENSG00000204505	PRAMEF9	protein_coding
ENSG00000284733	OR4F29	protein_coding
ENSG00000081019	RSBN1	protein_coding
ENSG00000180667	YOD1	protein_coding
ENSG00000177151	OR2T35	protein_coding
ENSG00000180708	OR10K2	protein_coding
ENSG00000168264	IRF2BP2	protein_coding
ENSG00000162775	RBM15	protein_coding
ENSG00000053371	AKR7A2	protein_coding
ENSG00000081692	JMJD4	protein_coding
ENSG00000179023	KLHDC7A	protein_coding
ENSG00000173171	MTX1	protein_coding
ENSG00000132128	LRRC41	protein_coding
ENSG00000143862	ARL8A	protein_coding
ENSG00000170075	GPR37L1	protein_coding
ENSG00000143376	SNX27	protein_coding
ENSG00000159409	CELF3	protein_coding
ENSG00000178796	RIIAD1	protein_coding
ENSG00000143436	MRPL9	protein_coding
ENSG00000143450	OAZ3	protein_coding
ENSG00000182134	TDRKH	protein_coding
ENSG00000213171	LINGO4	protein_coding
ENSG00000143365	RORC	protein_coding
ENSG00000225556	C2CD4D	protein_coding
ENSG00000196407	THEM5	protein_coding
ENSG00000159445	THEM4	protein_coding
ENSG00000197747	S100A10	protein_coding
ENSG00000123473	STIL	protein_coding
ENSG00000198854	C1orf68	protein_coding
ENSG00000203786	KPRP	protein_coding
ENSG00000240386	LCE1F	protein_coding
ENSG00000186226	LCE1E	protein_coding
ENSG00000172155	LCE1D	protein_coding
ENSG00000020129	NCDN	protein_coding
ENSG00000116819	TFAP2E	protein_coding
ENSG00000237763	AMY1A	protein_coding
ENSG00000174876	AMY1B	protein_coding
ENSG00000187733	AMY1C	protein_coding
ENSG00000186603	HPDL	protein_coding
ENSG00000197454	OR2L5	protein_coding
ENSG00000117643	MAN1C1	protein_coding
ENSG00000162430	SELENON	protein_coding
ENSG00000173212	MAB21L3	protein_coding
ENSG00000163531	NFASC	protein_coding
ENSG00000184144	CNTN2	protein_coding
ENSG00000143028	SYPL2	protein_coding
ENSG00000154429	CCSAP	protein_coding
ENSG00000143632	ACTA1	protein_coding
ENSG00000187815	ZFP69	protein_coding
ENSG00000117010	ZNF684	protein_coding
ENSG00000164002	EXO5	protein_coding
ENSG00000180098	TRNAU1AP	protein_coding
ENSG00000120656	TAF12	protein_coding
ENSG00000188060	RAB42	protein_coding
ENSG00000240038	AMY2B	protein_coding
ENSG00000243480	AMY2A	protein_coding
ENSG00000117266	CDK18	protein_coding
ENSG00000170498	KISS1	protein_coding
ENSG00000174567	GOLT1A	protein_coding
ENSG00000143850	PLEKHA6	protein_coding
ENSG00000158615	PPP1R15B	protein_coding
ENSG00000133056	PIK3C2B	protein_coding
ENSG00000198625	MDM4	protein_coding
ENSG00000143776	CDC42BPA	protein_coding
ENSG00000197056	ZMYM1	protein_coding
ENSG00000116560	SFPQ	protein_coding
ENSG00000203910	C1orf146	protein_coding
ENSG00000174842	GLMN	protein_coding
ENSG00000122484	RPAP2	protein_coding
ENSG00000162676	GFI1	protein_coding
ENSG00000067208	EVI5	protein_coding
ENSG00000279111	OR10X1	protein_coding
ENSG00000187701	OR2T27	protein_coding
ENSG00000203757	OR6K3	protein_coding
ENSG00000188340	OR6N2	protein_coding
ENSG00000163563	MNDA	protein_coding
ENSG00000196772	OR14A16	protein_coding
ENSG00000197591	OR11L1	protein_coding
ENSG00000162722	TRIM58	protein_coding
ENSG00000238243	OR2W3	protein_coding
ENSG00000177275	OR2AJ1	protein_coding
ENSG00000279263	OR2L8	protein_coding
ENSG00000132781	MUTYH	protein_coding
ENSG00000197532	OR6Y1	protein_coding
ENSG00000121903	ZSCAN20	protein_coding
ENSG00000198104	OR2T6	protein_coding
ENSG00000162727	OR2M5	protein_coding
ENSG00000198601	OR2M2	protein_coding
ENSG00000117523	PRRC2C	protein_coding
ENSG00000283683	MYOCOS	protein_coding
ENSG00000034971	MYOC	protein_coding
ENSG00000187730	GABRD	protein_coding
ENSG00000142609	CFAP74	protein_coding
ENSG00000116809	ZBTB17	protein_coding
ENSG00000183888	SRARP	protein_coding
ENSG00000173641	HSPB7	protein_coding
ENSG00000186510	CLCNKA	protein_coding
ENSG00000185519	FAM131C	protein_coding
ENSG00000184908	CLCNKB	protein_coding
ENSG00000116785	CFHR3	protein_coding
ENSG00000244414	CFHR1	protein_coding
ENSG00000134365	CFHR4	protein_coding
ENSG00000177462	OR2T8	protein_coding
ENSG00000142634	EFHD2	protein_coding
ENSG00000162438	CTRC	protein_coding
ENSG00000142621	FHAD1	protein_coding
ENSG00000169214	OR6F1	protein_coding
ENSG00000241128	OR14A2	protein_coding
ENSG00000153230	OR14K1	protein_coding
ENSG00000173285	OR10K1	protein_coding
ENSG00000177201	OR2T12	protein_coding
ENSG00000177212	OR2T33	protein_coding
ENSG00000160062	ZBTB8A	protein_coding
ENSG00000176261	ZBTB8OS	protein_coding
ENSG00000177535	OR2B11	protein_coding
ENSG00000213281	NRAS	protein_coding
ENSG00000009307	CSDE1	protein_coding
ENSG00000052723	SIKE1	protein_coding
ENSG00000180433	OR6K6	protein_coding
ENSG00000182783	OR2T29	protein_coding
ENSG00000186092	OR4F5	protein_coding
ENSG00000188558	OR2G6	protein_coding
ENSG00000077522	ACTN2	protein_coding
ENSG00000196240	OR2T2	protein_coding
ENSG00000197437	OR13G1	protein_coding
ENSG00000221888	OR1C1	protein_coding
ENSG00000228198	OR2M3	protein_coding
ENSG00000184022	OR2T10	protein_coding
ENSG00000197403	OR6N1	protein_coding
ENSG00000279301	OR2T11	protein_coding
ENSG00000198967	OR10Z1	protein_coding
ENSG00000163554	SPTA1	protein_coding
ENSG00000198965	OR10R2	protein_coding
ENSG00000050628	PTGER3	protein_coding
ENSG00000132485	ZRANB2	protein_coding
ENSG00000143379	SETDB1	protein_coding
ENSG00000143418	CERS2	protein_coding
ENSG00000143412	ANXA9	protein_coding
ENSG00000143363	PRUNE1	protein_coding
ENSG00000163141	BNIPL	protein_coding
ENSG00000143443	C1orf56	protein_coding
ENSG00000197622	CDC42SE1	protein_coding
ENSG00000213190	MLLT11	protein_coding
ENSG00000143409	MINDY1	protein_coding
ENSG00000162783	IER5	protein_coding
ENSG00000153029	MR1	protein_coding
ENSG00000160785	SLC25A44	protein_coding
ENSG00000091483	FH	protein_coding
ENSG00000117009	KMO	protein_coding
ENSG00000054277	OPN3	protein_coding
ENSG00000203668	CHML	protein_coding
ENSG00000054523	KIF1B	protein_coding
ENSG00000197785	ATAD3A	protein_coding
ENSG00000205090	TMEM240	protein_coding
ENSG00000160075	SSU72	protein_coding
ENSG00000197530	MIB2	protein_coding
ENSG00000116128	BCL9	protein_coding
ENSG00000174371	EXO1	protein_coding
ENSG00000196289	BECN2	protein_coding
ENSG00000197769	MAP1LC3C	protein_coding
ENSG00000162843	WDR64	protein_coding
ENSG00000152760	DYNLT5	protein_coding
ENSG00000152763	DNAI4	protein_coding
ENSG00000118473	SGIP1	protein_coding
ENSG00000143815	LBR	protein_coding
ENSG00000185842	DNAH14	protein_coding
ENSG00000222046	DCDC2B	protein_coding
ENSG00000143479	DYRK3	protein_coding
ENSG00000120337	TNFSF18	protein_coding
ENSG00000162368	CMPK1	protein_coding
ENSG00000212916	MAP10	protein_coding
ENSG00000162624	LHX8	protein_coding
ENSG00000117600	PLPPR4	protein_coding
ENSG00000076864	RAP1GAP	protein_coding
ENSG00000116981	NT5C1A	protein_coding
ENSG00000119283	TRIM67	protein_coding
ENSG00000116191	RALGPS2	protein_coding
ENSG00000254685	FPGT	protein_coding
ENSG00000177144	NUDT4B	protein_coding
ENSG00000162398	LEXM	protein_coding
ENSG00000132196	HSD17B7	protein_coding
ENSG00000163125	RPRD2	protein_coding
ENSG00000271383	NBPF19	protein_coding
ENSG00000205116	TMEM88B	protein_coding
ENSG00000117481	NSUN4	protein_coding
ENSG00000196944	OR2T4	protein_coding
ENSG00000172410	INSL5	protein_coding
ENSG00000116996	ZP4	protein_coding
ENSG00000196418	ZNF124	protein_coding
ENSG00000186440	OR6P1	protein_coding
ENSG00000232237	ASCL5	protein_coding
ENSG00000196427	NBPF4	protein_coding
ENSG00000263513	FAM72C	protein_coding
ENSG00000143393	PI4KB	protein_coding
ENSG00000197241	SLC2A7	protein_coding
ENSG00000196171	OR6K2	protein_coding
ENSG00000187170	LCE4A	protein_coding
ENSG00000160789	LMNA	protein_coding
ENSG00000127603	MACF1	protein_coding
ENSG00000219481	NBPF1	protein_coding
ENSG00000169717	ACTRT2	protein_coding
ENSG00000187942	LDLRAD2	protein_coding
ENSG00000142798	HSPG2	protein_coding
ENSG00000219073	CELA3B	protein_coding
ENSG00000142789	CELA3A	protein_coding
ENSG00000070831	CDC42	protein_coding
ENSG00000162552	WNT4	protein_coding
ENSG00000263961	RHEX	protein_coding
ENSG00000198049	AVPR1B	protein_coding
ENSG00000196550	FAM72A	protein_coding
ENSG00000266028	SRGAP2	protein_coding
ENSG00000263528	IKBKE	protein_coding
ENSG00000266094	RASSF5	protein_coding
ENSG00000143486	EIF2D	protein_coding
ENSG00000058453	CROCC	protein_coding
ENSG00000143494	VASH2	protein_coding
ENSG00000215883	CYB5RL	protein_coding
ENSG00000158816	VWA5B1	protein_coding
ENSG00000162650	ATXN7L2	protein_coding
ENSG00000120334	CENPL	protein_coding
ENSG00000162714	ZNF496	protein_coding
ENSG00000179639	FCER1A	protein_coding
ENSG00000152061	RABGAP1L	protein_coding
ENSG00000116748	AMPD1	protein_coding
ENSG00000177414	UBE2U	protein_coding
ENSG00000143147	GPR161	protein_coding
ENSG00000121904	CSMD2	protein_coding
ENSG00000134256	CD101	protein_coding
ENSG00000143772	ITPKB	protein_coding
ENSG00000049246	PER3	protein_coding
ENSG00000197084	LCE1C	protein_coding
ENSG00000273213	H3-2	protein_coding
ENSG00000184599	TAFA3	protein_coding
ENSG00000187800	PEAR1	protein_coding
ENSG00000135838	NPL	protein_coding
ENSG00000180198	RCC1	protein_coding
ENSG00000159527	PGLYRP3	protein_coding
ENSG00000122483	CCDC18	protein_coding
ENSG00000263956	NBPF11	protein_coding
ENSG00000203963	C1orf141	protein_coding
ENSG00000117501	MROH9	protein_coding
ENSG00000143851	PTPN7	protein_coding
ENSG00000196805	SPRR2B	protein_coding
ENSG00000266338	NBPF15	protein_coding
ENSG00000116922	C1orf109	protein_coding
ENSG00000179546	HTR1D	protein_coding
ENSG00000143536	CRNN	protein_coding
ENSG00000186207	LCE5A	protein_coding
ENSG00000169509	CRCT1	protein_coding
ENSG00000185966	LCE3E	protein_coding
ENSG00000163202	LCE3D	protein_coding
ENSG00000244057	LCE3C	protein_coding
ENSG00000092850	TEKT2	protein_coding
ENSG00000116863	ADPRS	protein_coding
ENSG00000171812	COL8A2	protein_coding
ENSG00000054116	TRAPPC3	protein_coding
ENSG00000116871	MAP7D1	protein_coding
ENSG00000160094	ZNF362	protein_coding
ENSG00000184389	A3GALT2	protein_coding
ENSG00000134686	PHC2	protein_coding
ENSG00000196242	OR2C3	protein_coding
ENSG00000075151	EIF4G3	protein_coding
ENSG00000197956	S100A6	protein_coding
ENSG00000196420	S100A5	protein_coding
ENSG00000196154	S100A4	protein_coding
ENSG00000188015	S100A3	protein_coding
ENSG00000196754	S100A2	protein_coding
ENSG00000188643	S100A16	protein_coding
ENSG00000189334	S100A14	protein_coding
ENSG00000189171	S100A13	protein_coding
ENSG00000160678	S100A1	protein_coding
ENSG00000160679	CHTOP	protein_coding
ENSG00000143553	SNAPIN	protein_coding
[truncated: 17,358 more rows]
