# Supplementary material for: The hypoxia-associated genes in immune infiltration and treatment options of lung adenocarcinoma
Source: PeerJ journal article supplement (doi:10.7717/peerj.15621), 2023-08-07

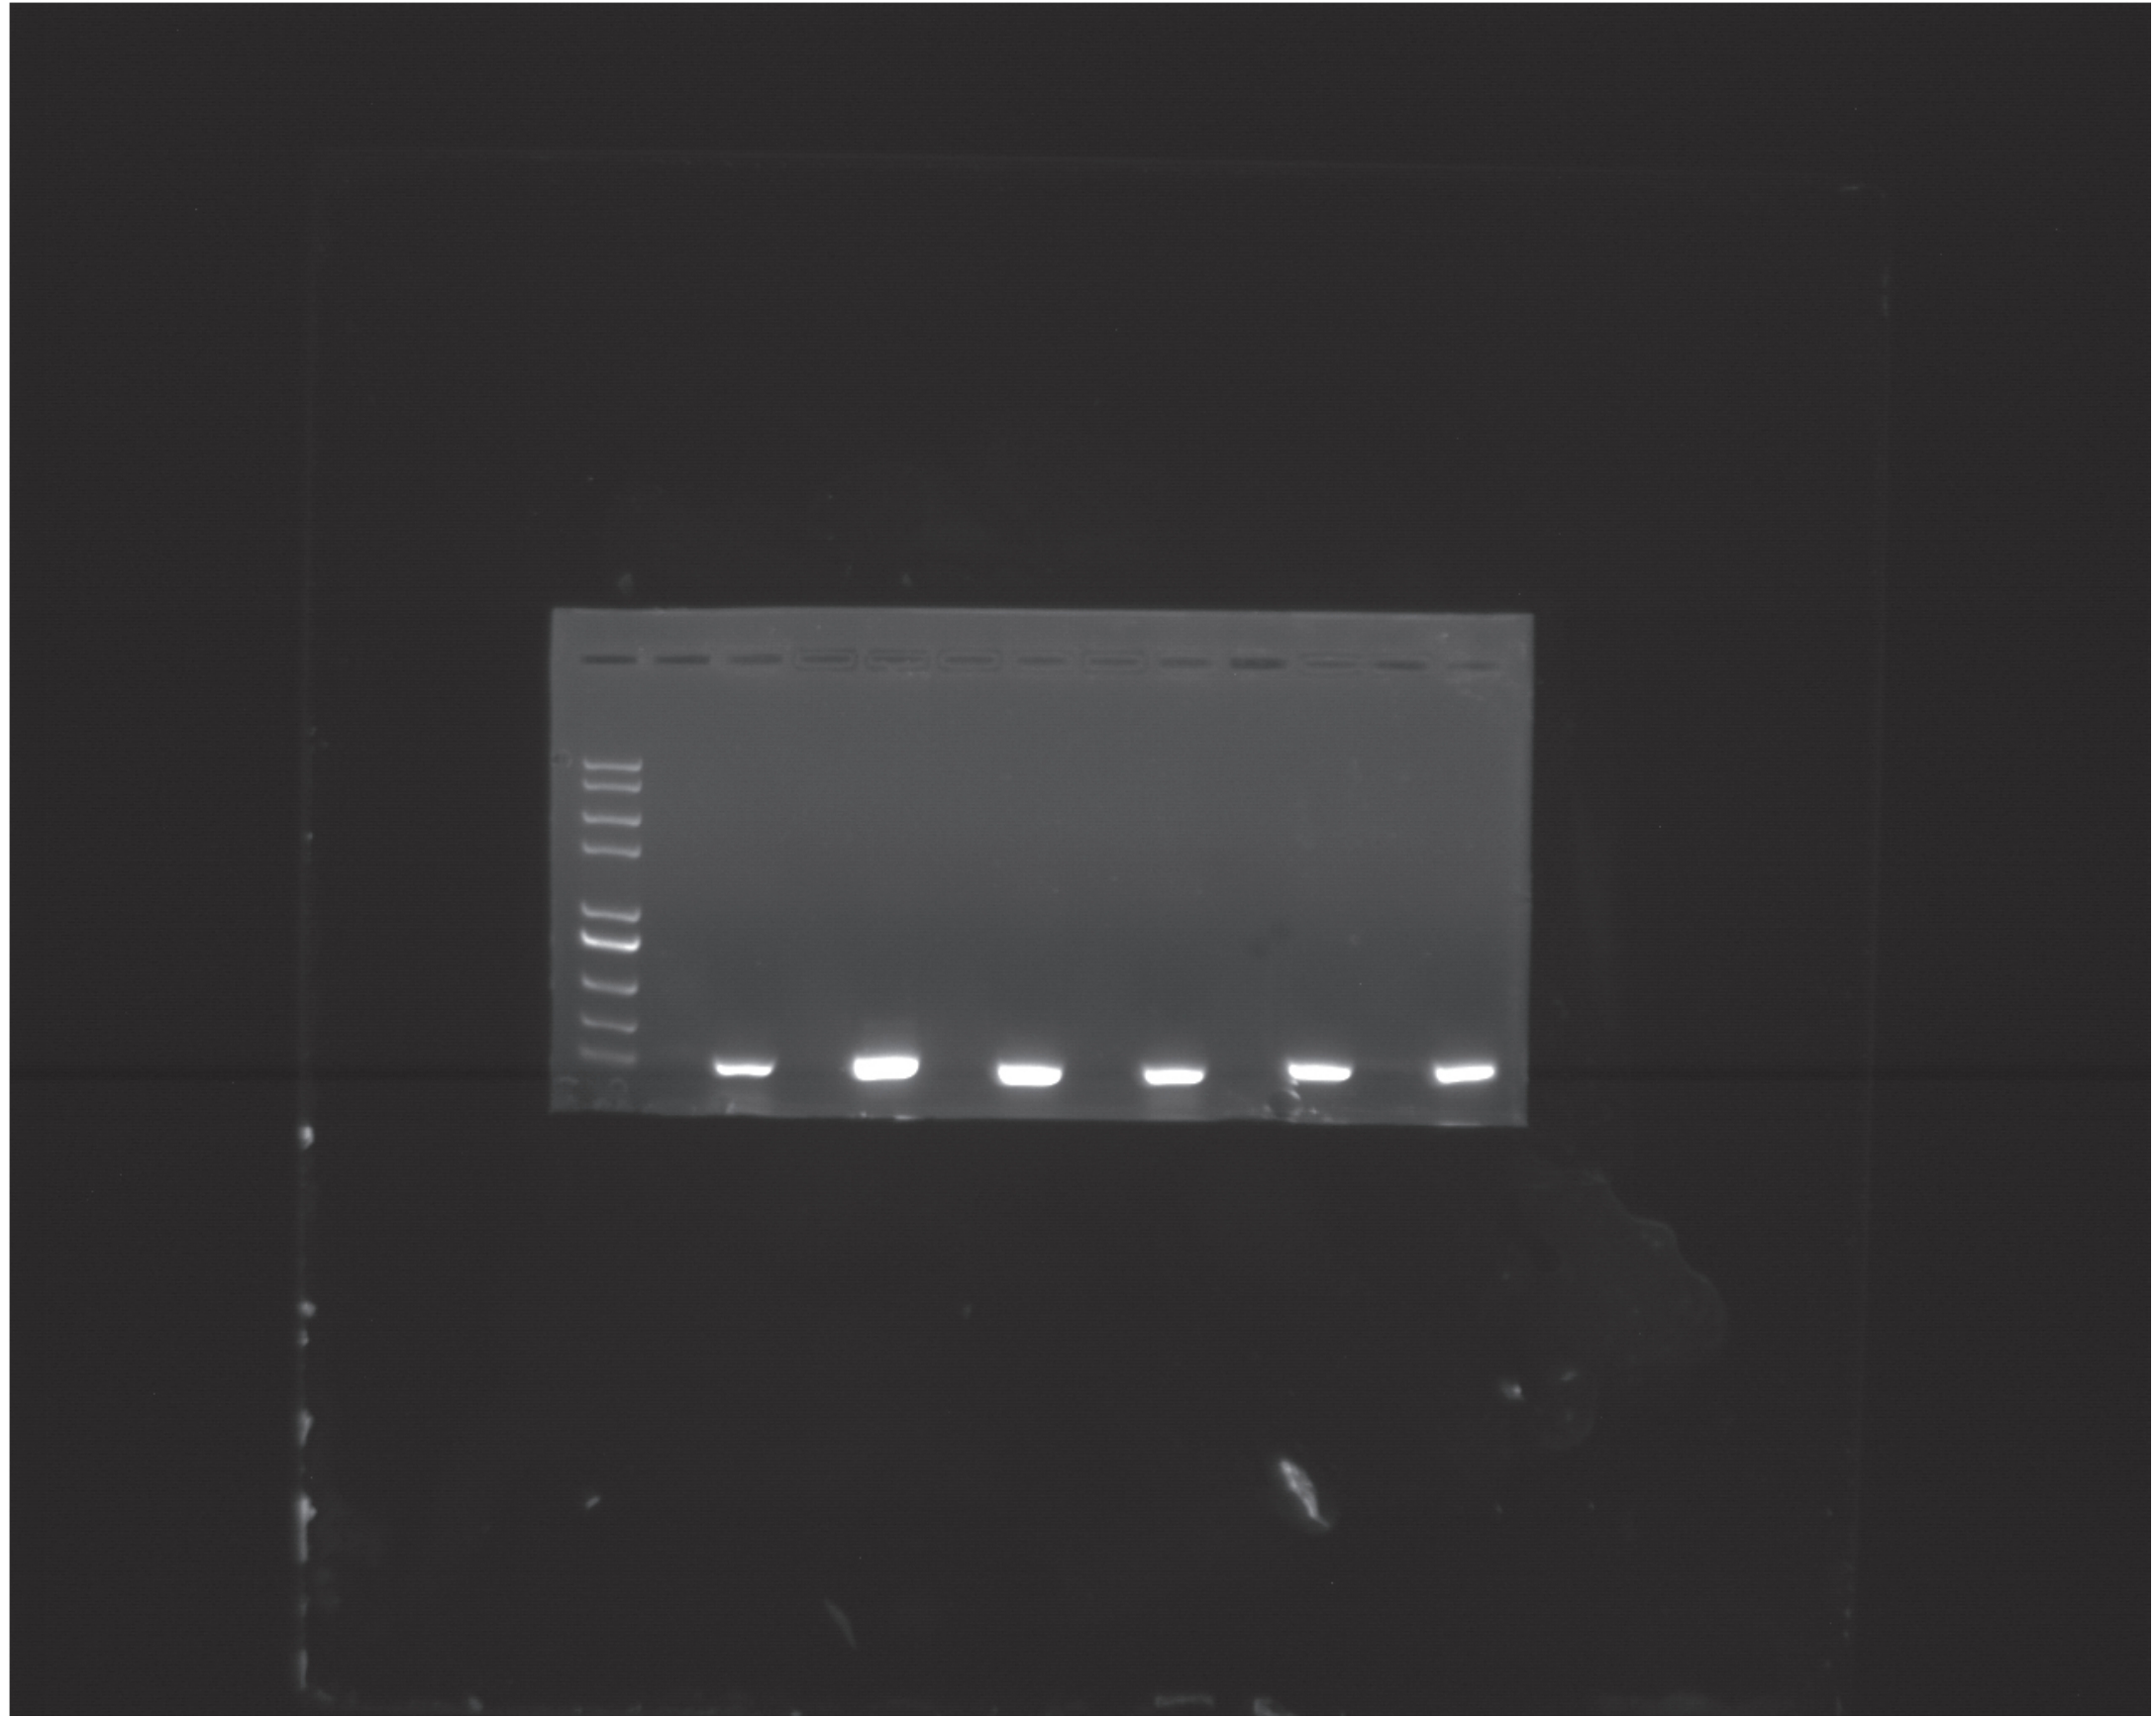

Supplement: Raw_data_Figure_8G_PCR.pdf [file Raw_data_Figure_8G_PCR.pdf]
